# Supplementary material for: What factors are associated with ambulance use for non-emergency problems in children? A systematic mapping review and qualitative synthesis
Source: PubMed Central journal article supplement — BMJ Open. 2021 Sep 28;11(9):e049443. doi: 10.1136/bmjopen-2021-049443 (PMC8480005; doi:10.1136/bmjopen-2021-049443), 2021-09-28
Supplement: bmjopen-2021-049443.draft_revisions.pdf [file bmjopen-2021-049443.draft_revisions.pdf]

# BMJ Open

BMJ Open is committed to open peer review. As part of this commitment we make the peer review history of every article we publish publicly available.

When an article is published we post the peer reviewers' comments and the authors' responses online. We also post the versions of the paper that were used during peer review. These are the versions that the peer review comments apply to.

The versions of the paper that follow are the versions that were submitted during the peer review process. They are not the versions of record or the final published versions. They should not be cited or distributed as the published version of this manuscript.

BMJ Open is an open access journal and the full, final, typeset and author-corrected version of record of the manuscript is available on our site with no access controls, subscription charges or pay-per-view fees (<http://bmjopen.bmj.com>).

If you have any questions on BMJ Open's open peer review process please email [info.bmjopen@bmj.com](mailto:info.bmjopen@bmj.com)

# BMJ Open

## What factors are associated with ambulance use for non-emergency problems in children? A systematic mapping review and qualitative synthesis

|                               |                                                                                                                                                                                                                                                      |
|-------------------------------|------------------------------------------------------------------------------------------------------------------------------------------------------------------------------------------------------------------------------------------------------|
| Journal:                      | <i>BMJ Open</i>                                                                                                                                                                                                                                      |
| Manuscript ID                 | bmjopen-2021-049443                                                                                                                                                                                                                                  |
| Article Type:                 | Original research                                                                                                                                                                                                                                    |
| Date Submitted by the Author: | 05-Feb-2021                                                                                                                                                                                                                                          |
| Complete List of Authors:     | Proctor, Alyesha; University of the West of England, Baxter, Helen; University of Bristol, Bristol Medical School: Population Health Sciences; University of Bristol Booker, Matthew; University of Bristol, School of Social and Community Medicine |
| Keywords:                     | PAEDIATRICS, ACCIDENT & EMERGENCY MEDICINE, GENERAL MEDICINE (see Internal Medicine)                                                                                                                                                                 |
|                               |                                                                                                                                                                                                                                                      |

SCHOLARONE™  
Manuscripts

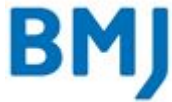

I, the Submitting Author has the right to grant and does grant on behalf of all authors of the Work (as defined in the below author licence), an exclusive licence and/or a non-exclusive licence for contributions from authors who are: i) UK Crown employees; ii) where BMJ has agreed a CC-BY licence shall apply, and/or iii) in accordance with the terms applicable for US Federal Government officers or employees acting as part of their official duties; on a worldwide, perpetual, irrevocable, royalty-free basis to BMJ Publishing Group Ltd ("BMJ") its licensees and where the relevant Journal is co-owned by BMJ to the co-owners of the Journal, to publish the Work in this journal and any other BMJ products and to exploit all rights, as set out in our [licence](#).

The Submitting Author accepts and understands that any supply made under these terms is made by BMJ to the Submitting Author unless you are acting as an employee on behalf of your employer or a postgraduate student of an affiliated institution which is paying any applicable article publishing charge ("APC") for Open Access articles. Where the Submitting Author wishes to make the Work available on an Open Access basis (and intends to pay the relevant APC), the terms of reuse of such Open Access shall be governed by a Creative Commons licence – details of these licences and which [Creative Commons](#) licence will apply to this Work are set out in our licence referred to above.

Other than as permitted in any relevant BMJ Author's Self Archiving Policies, I confirm this Work has not been accepted for publication elsewhere, is not being considered for publication elsewhere and does not duplicate material already published. I confirm all authors consent to publication of this Work and authorise the granting of this licence.

**TITLE:**

What factors are associated with ambulance use for non-emergency problems in children? A systematic mapping review and qualitative synthesis

**AUTHORS:**

Alyesha Proctor<sup>1</sup>, Helen Baxter<sup>2</sup>, Matthew Booker<sup>2</sup>

<sup>1</sup>Faculty of Health and Applied Sciences, University of the West of England, Glenside Campus (1H14), Blackberry Hill, Bristol, BS16 1DD, England

<sup>2</sup> Centre for Academic Primary Care, Bristol Medical School, University of Bristol, Whatley Road, Bristol, BS8 2PS, England

<sup>1</sup>alyesha.proctor@uwe.ac.uk (Advanced Paramedic Practitioner, Senior Lecturer, UWE)

<sup>2</sup>matthew.booker@bristol.ac.uk (Academic GP, NIHR Clinical Lecturer, Bristol Medical School)

<sup>2</sup>helen.baxter@bristol.ac.uk (Knowledge Mobilisation Research Fellow, Bristol Medical School)

\*corresponding author address: Alyesha Proctor, Glenside Campus, Blackberry Hill, Stapleton, Bristol, BS16 1DD.

## ABSTRACT:

### **Objective:**

To explore what factors are associated with ambulance use for non-emergency problems in children.

### **Primary and Secondary Outcome Measures:**

This study is a systematic mapping review and qualitative synthesis of published journal articles and grey literature. Data extraction was divided into two stages: extraction of data to generate a broad systematic literature 'map', and extraction of data from highly relevant papers utilising qualitative methods to undertake a focused qualitative synthesis. An initial table of themes associated with reasons for non-emergency calls to the ambulance for children formed the 'thematic map' element. The uniting feature running through all of the identified themes was the determination of 'inappropriateness' or 'appropriateness' of an ambulance call out, which was then adopted as the concept of focus for our qualitative synthesis.

### **Results:**

Four themes were developed in the systematic mapping stage; socio-economic status/geographical location, practical reasons, fear of consequences and parental education. Three analytical themes were developed in the qualitative synthesis stage including practicalities and logistics of obtaining care, arbitrary scoring system and retrospection.

### **Conclusions:**

There is a lack of public and caregiver understanding about the use of ambulances for paediatrics. There are factors that appear specific to choosing ambulance care for children that are not so prominent in adults (fever, reassurance, fear of consequences). Future areas for attention to decrease ambulance activation for paediatric low acuity complaints were highlighted as: identifying strategies for helping care-givers to mitigate perceived risk, increasing availability of primary care, targeted education to particular geographical areas, education to first time parents with infants, and providing alternate means of transportation.

**PROSPERO registration:** PROSPERO 2019 CRD42019160395

### **Strengths and limitations of the study:**

#### *Strengths:*

- The review is highly inclusive, including a range of global study settings, including qualitative, quantitative and mixed methods research.
- This is the first mapping review specifically exploring ambulance use among paediatrics with problems that could be managed in primary care.

#### *Limitations:*

- There is little evidence available addressing the specific question, reflected in the small number of studies suitable to the review criteria.
- Much of the data is retrospective and therefore often incomplete and not recorded accurately.
- Because of the limited evidence, the analysis is limited in areas.

## INTRODUCTION:

Despite an increasing range of urgent care options in the community, calls to the ambulance service continue to rise for 'non-emergency' problems [1]. This is particularly apparent with calls to paediatric patients, which could be due to a multitude of factors [2]. There is an absence of literature describing the factors associated with non-urgent ambulance/Emergency Medical Services (EMS) use for children [3]. Demand for health services is increasing, and understanding patient motivations to seek healthcare may assist the development of demand management strategies [4].

Growing numbers of people using emergency ambulances is leading to rising costs and increased pressure on resources[1], and are increasingly for calls that could be managed by an alternative healthcare provider (e.g. primary care), that may be better placed to offer a time-or-resource optimised response. Often, these calls are referred to in policy documents and academic literature as 'inappropriate', however, it is unclear if and *how* the concept of 'inappropriate' service use applies when considering children and ambulance calls. Previous work has focussed on exploring and reducing 'inappropriate' use of ambulances, however the definition of 'inappropriate' is complex and nuanced (e.g. [5]). Literature exploring 'inappropriate' ambulance use for *adults* shows that unsuitable use is often determined by healthcare professionals retrospectively [6]. Classifying calls as 'inappropriate' fails to recognise the context of the request for help and may be unhelpful for developing practical resolutions [7].

There is an array of evidence exploring why adults use EMS for non-emergency problems, suggesting that patients define circumstances worthy of emergency health resources according to socioemotional factors, rather than for the symptoms underlying their illness [4]. Reasons for children accessing emergency ambulances for non-emergency problems may be different to that of adults, particularly as calls are almost always made by a third-party. Given the demands placed on overstretched ambulance resources, it is important to understand why parents and carers call 999 for their children with non-emergency problems.

To our knowledge, there is no current systematic review exploring the drivers behind ambulance requests for children with non-emergency problems. Therefore, this review seeks to explore what is currently understood about the factors associated with ambulance use for non-emergency problems in children. The findings will be used to inform emerging interventions to more appropriately manage calls to the ambulance service for non-emergency problems in children.

## METHODS:

We undertook a systematic mapping review and qualitative synthesis of published journal articles and relevant grey literature, exploring the question 'What factors are associated with ambulance use for non-emergency problems in children?' A systematic map is a review methodology often used in health services research that aims to 'map out' and categorise literature on a specific topic with an aim of this developing into more comprehensive work [8], and is often used in health services research [9]. This methodology is particularly beneficial for summarising and organising a broad and varied evidence base, to identify a focus for more specific investigation [10].

### **Search Strategy:**

Searches were conducted on the following databases, for articles published between January 1980 and July 2020: MEDLINE, EMBASE, PsycINFO, CINAHL and AMED. A Google Scholar and a Web of Science search were undertaken to identify reports or proceedings not indexed in the above. Book chapters and theses were searched via the OpenSigle, EThOS and DART databases. A literature advisory group, including experts in the field, were contacted for relevant grey literature and unpublished reports. The database resources were selected, as they include the key medical databases. OpenGrey was used as the source for grey literature, as it covers the relevant subject areas for this review and has open access to over 700,000 bibliographic references. Search terms were developed iteratively by discussion among the research team and a librarian, seeking a balance between comprehensiveness and focus. A combination of MeSH terms and synonym text-strings/phrases were used in the search strategy, and were combined using Boolean operators. The full review protocol and search strategy was published prospectively in the PROSPERO register (registration reference PROSPERO 2019 CRD42019160395). Update searches were re-run before final analysis, and again prior to submission.

### **Search Terms:**

| <b>Ambulance</b>          | <b>Non-emergency</b> | <b>Children</b> |
|---------------------------|----------------------|-----------------|
| Pre-hospital              | Non-urgent           | Child           |
| Prehospital               | Minor                | Pediatric       |
| Paramedic                 | Primary care         | Paediatric      |
| Out of Hospital           | Non-serious          | Baby            |
| 999                       | Low acuity           | Babies          |
| EMT                       | Routine              | Infant          |
| EMS                       |                      | Schoolchild     |
| Emergency Medical Service |                      | Adolescent      |
| Emergency Call            |                      | Teenager        |
|                           |                      | Young person    |
|                           |                      | Parent          |
|                           |                      | Mother          |
|                           |                      | Father          |
|                           |                      | Neonate         |

### **Inclusion and Exclusion Criteria:**

The inclusion and exclusion criteria incorporated articles published in the English language between January 1980 and June 2020, reporting findings for the reasons behind why there are so many calls to the ambulance service for non-urgent problems in children. There were no restrictions on the types of study included in the systematic literature mapping stage of the review (Phase A). Due to the minimal qualitative research available, all articles were screened to identify whether they were suitable to be included in the qualitative synthesis stage of the review (Phase B). Studies were included if they had alluded to what was deemed as an 'inappropriate' or 'appropriate' call to the ambulance service. The 'WHO' definition of a 'child' was used for this review of international evidence: a child is defined as a person 19 years or younger unless national law defines a person to be an adult at an earlier age [11]. The papers reviewed were limited to English language studies, due to resource restrictions and the cost of translation. The systematic review included a wide range of primary research, to capture all relevant evidence. It was thought that limiting the search period to 1980 was likely to identify all, but a small minority of research completed before this time. Studies that reported purely on routine primary care or community care without any involvement of the

ambulance service, or only on situations, illnesses or circumstances where immediate treatment/intervention of a potentially life-threatening condition was required, or studies that reported purely on attendance to the emergency department if there was no mention of the pre-hospital phase, were excluded.

| Inclusion Criteria                                                                                                                          | Exclusion Criteria                                                                                                                                                 |
|---------------------------------------------------------------------------------------------------------------------------------------------|--------------------------------------------------------------------------------------------------------------------------------------------------------------------|
| Calls to the ambulance service                                                                                                              | Studies that report purely on routine primary care or community care without any involvement of the ambulance service                                              |
| Non-emergency problems                                                                                                                      | Studies that report purely situations, illnesses or circumstances where immediate treatment/intervention of a potentially life threatening condition was required. |
| A child under 19 years of age                                                                                                               | A person older than 19 years of age                                                                                                                                |
| English Language studies                                                                                                                    | Studies that report purely on attendance to the Emergency Department if there is no mention of the pre-hospital phase                                              |
| Primary quantitative, qualitative and mixed methods research                                                                                |                                                                                                                                                                    |
| Grey Literature                                                                                                                             |                                                                                                                                                                    |
| Date of publication 1980- present                                                                                                           |                                                                                                                                                                    |
| Studies were included if they had alluded to what was deemed as an 'inappropriate' or 'appropriate' call to the ambulance service (Phase B) |                                                                                                                                                                    |

### **Extracting, Coding, Synthesising and Analysing the Data:**

Data extraction was divided into two stages:

*Phase A:* extraction of data to generate a broad systematic literature 'map', and;

*Phase B:* extraction of data from highly relevant papers utilising qualitative methods to undertake a focused qualitative synthesis.

A thematic synthesis was undertaken, following the approach described by Thomas and Harden [12]. An initial table of themes associated with reasons for non-emergency calls to the ambulance service for children formed the 'thematic map' element (Phase A). The 'thematic mapping' element was high level, due to the heterogeneity of the studies in setting, methodology and focus. The uniting feature running through all of the identified themes was the determination of 'inappropriateness' or 'appropriateness' of an ambulance call out, and this formed the specific concept of focus for the qualitative synthesis (Phase B).

Owing to the inclusive nature of this review, and lack of relevant literature, it was decided to include findings from studies of all methodologies. Firstly, standard author, background, methods, findings/conclusions and limitations were extracted and inserted into a table. Following this, key messages for the mapping stage (Phase A) were extracted and included in the table. Verification was undertaken independently by other members of the research team and regular research meetings were held during the data extraction process; any disagreement was resolved by consensus discussion. For the qualitative synthesis (Phase B), papers from Phase A were screened, and reasons for inclusion or exclusion for this phase were also detailed in the table.



### *Phase A:*

In keeping with previously published work in this area [13], an inductive coding frame was developed to map emerging concepts. The key messages of all studies included at this stage (qualitative and quantitative) were extracted from the results/conclusions section, along with the methodology, where they were applicable to an ambulance service, and included non-emergency calls for children. After independently producing a series of pilot categories based on a sample of papers, the research team met to form consensus on category. Duplicate coding by another researcher took place on a sample of the papers, such that all the main themes were double coded. A summary literature map including the key themes was produced at this point.

### *Phase B:*

All papers deemed appropriate for the systematic mapping process (Phase A) were deemed eligible for entry into the thematic synthesis stage (Phase B). Of these, papers were screened for detail regarding how a call was deemed 'inappropriate' or 'appropriate', to identify eligibility. Due to a very limited number of qualitative journal articles, all methodologies were included. Working from a theoretical foundation of critical realism, a thematic synthesis of the qualitative literature was undertaken. This process was divided into the three stages described by Thomas and Harden [12]: line-by-line textual coding, generation of descriptive themes, and final formulation of analytical themes to take the understanding beyond the primary studies alone, and develop new interpretive constructs to provide greater understanding. Data from the results and discussion/conclusion sections of the included papers were individually coded. Each paper was then text-coded line-by-line, to generate a bank of translational codes. Papers were independently coded by members of the research team. Descriptive themes were generated for these translational codes, and were verified amongst the researchers in the team, with any disagreement resolved by consensus discussion.

### ***Assessment of Quality:***

Due to the inherent complexity in characterising 'quality' of the included studies, quality assessment was undertaken with the primary aim of informing the interpretation of the synthesis, rather than to exclude studies on the grounds of quality alone. All relevant studies were included in Phase A of the review without formal quality appraisal. Phase B used a modified version of the 10 point CASP tool [14]. The CASP checklist is often utilised for quality assessment in qualitative syntheses, encouraging assessment of a paper against several items related to the purpose, design, conduct and reporting of qualitative research. A modified CASP checklist was used in this synthesis to assess included papers under a number of headings: overall appropriateness of the qualitative methodology, credibility, transferability, dependability and confirmability, including detail of the reporting. No studies were excluded on assessment of quality grounds.

### ***Patient and public involvement:***

Lack of resources prohibited the use of a designated patient and public group for this study. However, the research question was informed by engagement with members of the public and professionals in on going emergency care research.

## **RESULTS:**

A total of 936 articles were identified in the initial searching process. After duplicates were removed, the total number of records screened was 836 (n=836). After screening titles and abstracts 769 articles were then excluded, which left 67 (n=67) full-text articles to be assessed for eligibility by two members of the research team, independently. Of these, 39 articles were excluded for reasons

1  
2  
3 including: no mention of the pre-hospital setting, included confirmed emergency patients only, no  
4 full article available, did not include children or was not relevant. Therefore, 28 (n=28) articles were  
5 used in the systematic mapping review (Phase A) (n=21 quantitative, n=2 mixed methods, n=2  
6 qualitative and n=2 literature reviews).  
7

8  
9 The Phase A papers were then read in detail to assess for any information regarding how the authors  
10 deemed calls to be 'appropriate' or 'inappropriate'. Eleven articles were excluded, due to no  
11 reference to the concept of 'appropriateness', leaving 17 articles for the qualitative synthesis stage  
12 of the review (Phase B) (n=13 quantitative, n=1 mixed methods, n=2 qualitative and n=1 literature  
13 review) [See Figure 1, PRISMA Flow chart] [15].  
14  
15  
16  
17  
18  
19  
20  
21  
22  
23  
24  
25  
26  
27  
28  
29  
30  
31  
32  
33  
34  
35  
36  
37  
38  
39  
40  
41  
42  
43  
44  
45  
46  
47  
48  
49

**Phase A: Systematic Map: What factors are associated with ambulance use for non-emergency problems in children?**

50 A summary literature map including key themes was produced (table 1), followed by the  
51 development of categories (table 2).  
52

| <i>Table 1 to show key themes for reasons associated with non-urgent calls to the ambulance service for children</i> |
|----------------------------------------------------------------------------------------------------------------------|
| 1. Geographical area (urban areas associated with more calls for non-urgent presentations)                           |
| 2. Lack of availability to be seen in primary care (both actual and perceived)                                       |
| 3. Uninsured patients (USA)                                                                                          |
| 4. Infants (under 1s)                                                                                                |

|                                                                                                                                   |
|-----------------------------------------------------------------------------------------------------------------------------------|
| 5. Parental education (including status and medical knowledge)                                                                    |
| 6. Lower socioeconomic area                                                                                                       |
| 7. Lack of understanding of the pre-hospital care system (unsure what qualifies for 'appropriate' ambulance call for their child) |
| 8. Parent perceived emergency- fever                                                                                              |
| 9. No other means of transportation                                                                                               |
| 10. First time parents                                                                                                            |
| 11. Parental unemployment                                                                                                         |
| 12. Schools                                                                                                                       |
| 13. Parental anxiety (particularly in higher socioeconomic areas)                                                                 |
| 14. Feeling of helplessness (particularly bystanders)                                                                             |

Table 2 to Show Categories of Key Themes

| Socioeconomic status/Geographical | Practical reasons                               | Fear of consequences                         | Parental education                                    |
|-----------------------------------|-------------------------------------------------|----------------------------------------------|-------------------------------------------------------|
| Geographical area-urban           | Lack of availability to be seen in primary care | Infants under 1 year                         | Status e.g. no degree                                 |
| Uninsured (USA)                   | No other means of transport                     | Schools                                      | Lack of understanding of the pre-hospital care system |
| Lower socioeconomic area          |                                                 | Parental anxiety (higher socioeconomic area) | Unsure what constitutes as an emergency               |
| Parental unemployment             |                                                 | Feeling of helplessness                      | Perceived emergency                                   |
|                                   |                                                 |                                              | First time parents                                    |

#### *Socioeconomic status and geographical location:*

Several studies have found a significant link between location and non-emergency calls to the ambulance for children; in particular, urban areas were associated with more ambulance use [3, 16]. One study assessing the 'appropriateness' of ambulance use in paediatrics presenting to the Emergency Department (ED) identified a higher rate of what the authors termed as 'misuse' of ambulances for children in urban populations, and suggested that suburban parents would be less likely to call the ambulance 'inappropriately'. The authors wrote that suburban locations have lower rates of 'misuse', since they are accustomed to coming to the hospital via private vehicle [17].

One North American retrospective study found that parents with children in areas with lower income used EMS more frequently, and repetitively (11% called the ambulance more than once in the three years). The authors reported a significant linear relationship between transport rate and family income by postcode [18]. In a German study, medium socioeconomic status was associated with the lowest percentage of non-emergency calls to the ambulance service for children. There were several 'inappropriate' calls due to what the authors described as 'over anxiety' of parents in high socioeconomic areas, however this was still not as many as in the lower socioeconomic areas [19]. Salmi *et al.* [20] aimed to explore whether the socioeconomic status of a neighbourhood could predict the incidence of paediatric out of hospital emergencies in Finland, and concluded that poorer neighbourhoods significantly increased ambulance use for children.

1  
2  
3 Several studies reported that Medicaid patients account for the majority of non-emergency calls to  
4 the ambulance for children; 43% of patients were insured by Medicaid, (the United States federal  
5 and state program that helps with medical costs for people with limited income) and 60% of what  
6 the authors termed as 'unnecessary' calls were to those without commercial insurance [17]. Further  
7 studies also concluded that non-insured paediatric patients had significantly higher rates of  
8 ambulance use compared to those who were privately insured [16, 19, 21].  
9

#### 10 11 *Parental education:*

12  
13 The most common presenting complaint for 'inappropriate' ambulance use in children was fever;  
14 nearly half of the calls for fever in children were deemed non- emergency and an unnecessary use of  
15 the ambulance [17]. Ninety-two percent of children who were conveyed via ambulance to the ED  
16 with these symptoms were discharged home with no intervention [22]. The authors concluded that  
17 parents overestimate the seriousness of fever, and that parents are often unsure as to what qualifies  
18 as an emergency requiring an ambulance for their children [23].  
19

20  
21 A prospective single centre cohort study conducted in Germany aimed to provide current data on  
22 the 'inappropriate' use of ambulances for children and explore the reasons why. The main factor  
23 was parental perceived emergency, particularly with first time parents [19], which was a common  
24 finding in other studies [24]. A lower paternal and maternal educational status resulted in  
25 significantly more EMS use. Speculatively, the authors suggest that parents with low income have  
26 poorer medical knowledge and this is associated with 'inappropriate' use of ambulances- 'A lack of  
27 basic medical knowledge and experience in the proper assessment of children appears to be a  
28 contributing factor to inappropriate ambulance use for non-urgent problems'. Lower parental  
29 education or 'inadequate parental health literacy' as the authors write, seems to be associated with  
30 more calls internationally, and of these calls, more are low acuity [20].  
31  
32

#### 33 34 *Practical reasons:*

35  
36 Shah *et al.* [3] identified a link between increased EMS use for non-emergency problems in children  
37 if there was limited availability in Primary Care health services. Similarly Sinclair [25] found there  
38 was an increase in ambulance use due to lack of access to primary care physicians in the community,  
39 and lack of community support for children.  
40

41  
42 A common reason identified in the studies for parents calling an ambulance for non-emergency  
43 problems is lack of transport to take their child to the ED [26, 27]. This was particularly the case for  
44 single parents [2]. Kost and Arruda [17] report that parents admitted that they called the ambulance  
45 if there was no other means of transportation or if they had other childcare considerations; 'they  
46 would have used a taxi or shuttle if they could'. Similarly, one study found that often parents knew  
47 that an ambulance was not required, however 40% of parents stated they had no other means of  
48 transportation [28]. A descriptive survey study found that parents will call the ambulance for  
49 convenience as well as perceived need [29]. Additionally, one study found that parents believe that  
50 they will be seen faster in ED if they arrive there via ambulance [2].  
51

#### 52 53 *Fear of consequences:*

54  
55 Parents' and care givers' fear of doing the wrong thing ethically and morally, being advised by other  
56 healthcare professionals to follow a certain course of action (e.g. ambulance) even if they felt it  
57 clinically unnecessary, reduced confidence in their own judgement, and not wanting to take any risks  
58 were all common reasons for calling the ambulance for non-urgent problems in children [2]. One  
59 study found that parents of infants (under one) are more likely to utilise the ambulance service [18]  
60

and that parents often overestimate their child's illness [28]. Eastwood *et al.* [30] completed a descriptive epidemiological review in Australia, which showed that often parents call the ambulance for reassurance. As far as schools are concerned, the majority of ambulance transport is unjustified; however, schools call for emergency services due to fear of consequences, which poses an area of potential relief for the ambulance service which is already stretched to its limits [24]. Heightened anxiety due to previous experiences of traumatic events also resulted in 'inappropriate' calls to the ambulance [2].

**Phase B: Qualitative Synthesis: How are calls to the ambulance service for children deemed 'inappropriate'?**

A total of 15 descriptive themes were developed iteratively by repeated rounds of reductive grouping of codes, until no additional discrete codes were needed to fully describe the dataset (table 3). These key themes were then split into 'thematic groups' (table 4). By analysing patterns in the free codes and descriptive themes within and across the seven thematic groups, a number of cross relationships between groups were identified. Through a process of comparing the theme groups and their constituent descriptive themes, three overarching analytical themes were identified and discussed below (table 5).

*Table 3 to show descriptive themes related to how calls to the ambulance for non-urgent problems in children have been deemed inappropriate*

|                                                                                                                                                                                                                                                                                  |
|----------------------------------------------------------------------------------------------------------------------------------------------------------------------------------------------------------------------------------------------------------------------------------|
| 1. Calls are deemed 'appropriate' by ED doctors using predetermined criteria from a Delphi study, such as: requiring CPR, respiratory distress, seizure, altered mental status, unable to walk, admitted to ICU, ambulance called by GP, RTA, parents not available to transport |
| 2. 'Inappropriate' if the main reason for the call was due to lack of transport                                                                                                                                                                                                  |
| 3. 'Inappropriate' if there has been no intervention/investigation/treatment in ED or by paramedics                                                                                                                                                                              |
| 4. Appropriateness determined using the Emergency Severity Index                                                                                                                                                                                                                 |
| 5. Classed as 'Inappropriate' if not an acute onset of symptoms                                                                                                                                                                                                                  |
| 6. Determined by ED doctors with varying levels of qualification – the more experience the clinician, the more they thought calls were 'Inappropriate'                                                                                                                           |
| 7. Parental perception of 'non-life threatening' associated with 'Inappropriate' calls                                                                                                                                                                                           |
| 8. 'Inappropriate' calls associated with not calling the GP first (if patients have tried this and exhausted alternative options than can be deemed as more appropriate)                                                                                                         |
| 9. Appropriateness was often based on vital signs                                                                                                                                                                                                                                |
| 10. Deemed 'Inappropriate' if assigned 'non-urgent' at triage in ED                                                                                                                                                                                                              |
| 11. Deemed 'Inappropriate' if could be managed more suitably in primary care                                                                                                                                                                                                     |
| 12. Australian Triage Score (if scores 4 or 5 then deemed non-urgent and inappropriate use)                                                                                                                                                                                      |
| 13. Deemed as non-urgent if it was safe to use alternative transport                                                                                                                                                                                                             |
| 14. Deemed non-urgent if the condition is unlikely to deteriorate or require admission/surgery                                                                                                                                                                                   |
| 15. 'Appropriate' if 'lights and sirens' are used                                                                                                                                                                                                                                |

*Table 4 to show thematic groups of how calls were determined to be 'inappropriate':*

|                                                                                         |
|-----------------------------------------------------------------------------------------|
| Determined by clinicians                                                                |
| Determined retrospectively                                                              |
| Determined on the level of acuity                                                       |
| Determined using a scoring system                                                       |
| Determined because of practical reasons, such as no transport and not contacting the GP |
| Determined because the problem would be more suitably managed in primary care           |

Determined because of speaking to a GP first

*Table 5 to show analytical themes*

Practicalities and logistics of obtaining care

Arbitrary scoring system

Retrospection

The practicalities and logistics of obtaining care domain, contains descriptive themes relating to the practical reasons for determining ‘inappropriate’ use of an ambulance, including themes associated with convenience, access issues and transport. The arbitrary scoring system domain brings together descriptive themes concerning the use of scoring tools to determine whether a call to the ambulance is ‘inappropriate’ or not. The retrospection domain refers to the descriptive themes relating to calls being deemed as ‘inappropriate’ retrospectively by clinicians, for example after vital signs have been taken.

*Practicalities and logistics of obtaining care:*

Many of the themes identified that calls were considered to be ‘inappropriate’ because of practical aspects, logistical difficulties and convenience. In one study parents and care givers had called an ambulance solely due to having no other means of transportation, this was deemed as an ‘inappropriate’ use of the ambulance service [28]. The authors identified that 40% of parents admitted to calling the ambulance due to having no transport, and of those 80% were considered ‘inappropriate’. Other studies determined ‘inappropriate’ ambulance use if it was safe to use alternative transport [31, 26, 27].

Several studies suggested that parents and caregivers use ambulances for convenience and this is ‘inappropriate’ [28], particularly if the complaint could be suitably managed in primary care [32]. Parental perception of the situation as non-life threatening was associated with ‘inappropriate’ use of the ambulance service, where parents and caregivers actually expressed that ambulance transportation is more convenient, if not strictly a necessity at times [19]. ‘Inappropriate’ use of ambulances was associated with parents and care givers not calling a GP first when indicated (non-life-threatening medical need) [19], and when they sought advice from a GP first, the use of emergency services was considered more ‘appropriate’ [23]. Equally, calls to the ambulance for children were deemed ‘appropriate’ if patients had tried to access their GP, but that system has failed them [27].

*Arbitrary scoring system:*

Several studies sought to determine ‘inappropriateness’ using semi-objective arbitrary scoring or coding systems. Kost and Arruda[17] analysed records retrospectively and deemed ambulance transport unnecessary unless the medical record included any of the following criteria: Cardiopulmonary Resuscitation, respiratory distress, immobilisation, inability to walk, admission to Intensive care Unit, ambulance recommended by medical personnel, Road Traffic Collision, or parents not on scene. The authors considered these criteria to be more liberal than others. In Bober *et al.* [16] study, Accident and Emergency doctors considered 61% of paediatric arrivals by ambulance as ‘unnecessary’. The doctors determined ‘appropriateness’ using the emergency severity index levels (a validated triage tool used in the ED), which has been used in other studies [33]. Similarly calls to the ambulance have been thought of as ‘inappropriate’ if they were deemed as non-emergency at triage in the ED [28]. Other tools used to determine ‘appropriateness’ is the



1  
2  
3 Australian triage score[29]; if children scored 4 or 5 (non-urgent) then the call was thought to be'  
4 'inappropriate'.  
5

6 *Retrospection:*  
7

8 The majority of studies sought to determine 'inappropriateness' retrospectively, normally by a  
9 variety of different clinicians. This is an important consideration, as this suggests that the call can  
10 only be deemed 'inappropriate' after the consultation process and diagnosis. In a German study,  
11 calls were determined to be an 'inadequate' or 'adequate' use of the ambulance service by three  
12 doctors of different seniority [19]. Interestingly, there were significant differences in what the three  
13 doctors considered to be 'inappropriate' calls to the ambulance service and this was dependent on  
14 experience; the more experienced doctor reported more calls to be 'inappropriate'. Similarly,  
15 'appropriate' use of the ambulance service in one study was determined by a doctor, based primarily  
16 on chief complaint, general appearance, vital signs, and ambulance patient report forms, which  
17 concluded that 61% of ambulance calls to children were 'inappropriate' [28]. A US study involving  
18 children utilised medical necessity criteria agreed at a consensus conference, to make an assessment  
19 on 'appropriateness', and concluded that 16.4% of all transports were an unnecessary use of the  
20 ambulance [21].  
21  
22  
23

24 A qualitative study interviewing paramedics on what they considered to be the 'appropriate' use of  
25 the ambulance service concluded that a call is 'appropriate' if it needed 'lights and sirens' to hospital  
26 and was of a 'life threatening' nature [27]. Calls were considered 'inappropriate' if there had been no  
27 ambulance intervention [17], unless the child was under two years old [34], or if there was not an  
28 acute onset of symptoms [19]. It is clear that 'fever' as a presenting complaint is considered the  
29 most 'inappropriate' use of ambulances for children by clinicians according to the literature [31].  
30  
31  
32  
33

34 **DISCUSSION:**  
35

36 This systematic review involved a two-stage process exploring which factors are associated with  
37 ambulance use for non-emergency problems in children, and how 'inappropriateness' in non-urgent  
38 ambulance use in children has been determined. The reasons for parents and care givers calling 999  
39 for their children with non-emergency conditions are complex and multifaceted. This review reveals  
40 an intricate relationship between the urgency of the clinical problem and the 'appropriateness' of  
41 ambulance service use. To our knowledge, there is no review exploring the factors associated with  
42 non-emergency ambulance use in children. An important consideration across the identified factors,  
43 which was illustrated by the systematic map (Phase A) was how to determine 'appropriateness' or  
44 not. Undertaking a thematic synthesis enabled the research team to go beyond the individual  
45 frameworks that each paper had used to determine this, and combined to the knowledge to identify  
46 gain understanding on the 'concept' of 'inappropriateness' in non-emergency ambulance use in  
47 children.  
48  
49  
50

51 *Systematic Map:*  
52

53 Previous work examines how help-seeking may apply to some urgent care settings, such as EDs [35,  
54 36]. It is apparent that some parents will bring their child to the ED for non-urgent care, due to  
55 perceived difficulties with contacting their GP, and the presumed advantages of ED care. Findings  
56 from this review also suggest that parents call the ambulance for non-emergency problems due to  
57 perceived barriers for accessing their GP, and speed of access. The studies in the review suggested  
58 that perceived problems with primary healthcare services were affecting parents' and caregivers'  
59  
60

1  
2  
3 use of the ED and ambulance services for minor illness. Convenience was also a reason highlighted in  
4 the studies for parents attending the ED [37]. Perceived urgency was a main theme identified in this  
5 study and is also the most frequently cited reason for visiting the ED by parents of children  
6 presenting with non-urgent issues [37]. Often, parents felt that their child's condition constituted a  
7 genuine emergency, but did not necessarily require an ambulance, which was called due to lack of  
8 transportation. First-time parents, and children under one year were common reasons for non-  
9 emergency calls to the ambulance service, which aligns with other studies on presentation at EDs,  
10 which was increased among parents of newborns and first-time parents [38].

11  
12  
13 Aligning with previous studies focused on adults, our findings show that increased ambulance use  
14 for non-urgent problems in children is conceptually associated with lower socio-economical urban  
15 locations [39]. In addition, this review identified that uninsured children (US studies) was an  
16 associating factor for non-emergency ambulance use, which has also been reported in previous  
17 studies of adults [21]. Another common motivator is lack of transport, which is a factor also  
18 identified in the non-emergency use of ambulance services with adults [40]. The socio-demographic  
19 factors of rurality, deprivation and education may warrant further investigation to understand the  
20 underlying factors behind this increased use.

21  
22  
23 The most common presenting complaint associated with non-emergency calls to the ambulance  
24 service for children was fever [22]. This suggests an area of parental education that could be  
25 improved in order to reduce non-emergency calls to the ambulance service, and may have  
26 implications to how calls are triaged. This is reported in other studies suggesting that focusing  
27 educational efforts in regards to 'appropriate' ambulance use on the adolescent population will  
28 likely reduce 'inappropriate' ambulance use in the paediatric population [16]. Additionally, further  
29 exploration at the ambulance triage and dispatch stage for children may be beneficial [16]. Fear of  
30 the consequences among parents and care-givers where children are concerned is a clear factor in  
31 increased ambulance use, however, parental concern could be a legitimate triage discriminator.  
32 Recurring messages in other literature also portrays patient and carer uncertainty around urgency,  
33 the fear of harm if treatment is delayed and the value placed on clinical assessment for reassurance  
34 [41]. The findings of this review indicate that parents and carers often do not know exactly what  
35 type of help they need when they contact urgent care services, or what constitutes a need for an  
36 emergency ambulance for their child [19]. Providing parents with the knowledge about what  
37 constitutes emergency and non-emergency care for typical infantile diseases could help with  
38 parents' decision making.

#### 39 40 41 42 43 44 *Qualitative synthesis:*

45  
46 The assessment of 'inappropriateness' of an ambulance contact is multifaceted and diverse in the  
47 evidence, which is a result of methodological limitations and conceptual variation. According to the  
48 evidence 'Inappropriate' use of the ambulance service for children is at a similarly high level to that  
49 of the adult population [17]. The majority of studies sought to determine 'inappropriateness'  
50 retrospectively, using semi-objective (yet arbitrary) scoring systems, and almost universally  
51 determined by clinicians following an assessment that included recording of vital signs [42].  
52 However, the assessment of 'appropriateness' based on information obtainable after clinical  
53 assessment will likely overestimate 'inappropriate' use, and disregards the multifaceted psychosocial  
54 context of the demand for help, which is even greater when concerning children. Authors have  
55 suggested that there is not enough information in the 'diagnostic label' alone to judge whether a call  
56 is 'appropriate' or not [5].  
57  
58  
59  
60



1  
2  
3 Clearly, one of the issues with deeming a call to be 'inappropriate' is how this is classified differently  
4 by professionals, compared to the lay public [4]. The higher the acuity, the greater it seems to be  
5 considered as 'appropriate' by clinicians. However, there are no hard and fast criteria; for example,  
6 'those needing lights and sirens' is still a personal judgement. It seems that if a *clinician* thinks it is an  
7 urgent call, then it is 'appropriate' but what is urgent to a clinician can be different to the general  
8 public. Indeed, as reflected in the findings from the current study, previous literature suggests  
9 differences between clinician classifications of emergency (based on physiological measures) are in  
10 contrast with patient-based determinations of emergency, (often defined by practical factors or fear  
11 of consequences).

12  
13  
14 There is suggestion that calls are 'inappropriate' if there is no ambulance intervention, however this  
15 is arguable because patients often benefit from rapid transportation, particularly children [17]. Calls  
16 were deemed as 'inappropriate' if other transport options or other services were available and more  
17 suitable [26]. In other work, studies have shown that patients and carers 'weigh up' how practical  
18 the use of the ambulance service (or alternatives) are for their perceived needs, and sometimes  
19 patients genuinely expect the ambulance service to treat minor ailments [7]. This shows a lack of  
20 public and caregiver understanding about the use of ambulances for paediatrics.

#### 21 22 23 24 25 26 *Limitations:*

27 The heterogeneity of study methodologies presents a challenge in drawing together associated and  
28 conflicting findings. There is little evidence available addressing the specific question, reflected in  
29 the small number of studies suitable to the review criteria. Because of the limited evidence, the  
30 analysis is limited in areas. Much of the data is retrospective and therefore often incomplete and not  
31 recorded accurately. All included studies in this review were carried out in wealthy countries. It is  
32 likely that many of the issues will remain the same for low-income countries, however some will be  
33 unique given the variability in cultural, economic and political contexts. By limiting our searches to  
34 the English language, we may have inadvertently excluded important sources.

#### 35 36 37 38 39 40 **CONCLUSION AND FUTURE RESEARCH:**

41 There is a lack of public and caregiver understanding about the use of ambulances for paediatrics.  
42 There are some factors that appear specific to choosing ambulance care for children that are not so  
43 prominent in adults (fever, reassurance, fear of consequences) and there are some ways in which  
44 'appropriateness' might be looked at differently for children and adults. Further primary, qualitative  
45 research is required to explore parents, care givers, teachers and young teenagers' reasons for  
46 calling the ambulance for non-emergency problems in children. Providing alternate means of  
47 transportation, strategies for helping care givers to mitigate perceived risk, increasing the perception  
48 and reality of access to urgent primary care or targeted education to certain residential areas and  
49 first time parents with infants (particularly regarding fever), may decrease unnecessary ambulance  
50 activation for paediatric low acuity complaints. Most studies included were conducted in high-  
51 income countries, subsequently there is a need for further investigation among low-income  
52 countries, which may provide important and unique insights. Future interventions could be designed  
53 to impact parents' decision making prior to calling an ambulance for their child. Both policy makers  
54 and academics need to work towards a contextually-nuanced and consistent definition of  
55 'appropriate' ambulance resource use.  
56  
57  
58  
59  
60

**Word Count (excluding tables, titles, references):**

4950

**Keywords:**

Systematic review; non-emergency; ambulance; children; qualitative synthesis; appropriateness

**Conflict of interest:**

NONE

No support from any organisation for the submitted work; no financial relationships with any organisations that might have an interest in the submitted work in the previous three years, no other relationships or activities that could appear to have influenced the submitted work.

**Copyright:**

The Corresponding Author has the right to grant on behalf of all authors and does grant on behalf of all authors, an exclusive licence (or non-exclusive for government employees) on a worldwide basis to the BMJ Publishing Group Ltd to permit this article (if accepted) to be published in BMJ editions and any other BMJ PGL products and sublicenses such use and exploit all subsidiary rights, as set out in our licence.

**Transparency statement:**

This manuscript is an honest, accurate and transparent account of the study being reported. No important aspects of the study have been omitted and any discrepancies from the study as originally planned have been explained.

**Funding source:**

MB is funded by an NIHR Clinical Lecturer Post

**Ethical Approval:**

Not required

**Data sharing:**

No additional data available

**Contributor statement:**

MB developed the original idea and supervised the work. AP conducted the review and took a lead on writing the manuscript. All authors interpreted and analysed the results. All authors discussed the results and contributed to the final manuscript. HB finalised approval of the version to be published.

**REFERENCES:**

[1] NHS England (2013) High quality care for all, now and for future generations: Transforming urgent and emergency care services in England. Available at: <https://www.england.nhs.uk/wp-content/uploads/2013/06/urg-emerg-care-ev-bse.pdf> [Accessed 30 July 2020].

[2] O’Cathain, A., Connel, J., Long, J. and Coster, J. (2019) ‘Clinically unnecessary’ use of emergency and urgent care: A realist review of patients’ decision making. *Health Expectations*, 23(1).

- 1  
2  
3 [3] Shah, M.N., Cushman, J.T., Davis, J. Bazarian, J., Auinger, P, and Friedman, B. (2008) The  
4 epidemiology of emergency medical services use by children: an analysis of the national hospital  
5 ambulatory medical care survey, *Prehospital Emergency Care*, 12(3), pp. 269-76.  
6  
7 [4] Morgans, A. and Burgess, S.J. (2011) What is a health emergency? The difference in definition  
8 and understanding between patients and health professionals. *Australian Health Review*, 35(3), pp.  
9 284-289.  
10  
11 [5] Snooks, H., Wrigley, H. and George, S. (1998) Appropriateness of use of emergency ambulances.  
12 *Journal of Accident Emergency Medicine*, 15, pp. 212–18.  
13  
14 [6] Durand, A.C., Palazzolo, S., Hardouin, N.T., Gerbeaux, P., Sambuz, R., and Gentile, S. (2012)  
15 Nonurgent patients in emergency departments: rational or irresponsible consumers? Perceptions of  
16 professionals and patients. *BMC Research Notes*, 5(525).  
17  
18 [7] Booker, M.J., Purdy, S. and Shaw, A.R.G. (2017) Seeking ambulance treatment for ‘primary care’  
19 problems: a qualitative systematic review of patient, carer and professional perspectives. *BMJ Open*.  
20  
21 [8] Grant, M.J. and Booth, A. A. (2009) Typology of reviews: an analysis of 14 review types and  
22 associated methodologies. *Health Info Library*, 26(91).  
23  
24 [9] Oakley, A., Gough, D. and Oliver, S. (2005) The politics and evidence of methodology: lessons  
25 from the EPPI-Centre. *Evid Policy*, 1(5).  
26  
27 [10] Pope, C., Mays, N. and Popay, J. (2007) *Synthesizing qualitative and quantitative health*  
28 *evidence: a guide to methods*. Berkshire, England: Open University Press.  
29  
30 [11] World Health Organisation (2020) *Definition of Key Terms*. Available at  
31 <https://www.who.int/hiv/pub/guidelines/arv2013/intro/keyterms/en/> [Accessed 02/08/20].  
32  
33 [12] Thomas, J. and Harden, A. (2008) Methods for the thematic synthesis of qualitative research in  
34 systematic reviews. *BMC Med Res Methodology*, 8(45).  
35  
36 [13] Campbell, R., Pound, P., Pope, C., Britten, N., Pill, R., Morgan, M., et al. (2003). Evaluating meta-  
37 ethnography: a synthesis of qualitative research on lay experiences of diabetes and diabetes care.  
38 *Social Science & Medicine*, 56, 671-684.  
39  
40 [14] Critical Appraisal Skills Programme (CASP) CASP Checklists. UK: Oxford. Available at:  
41 <http://www.casp-uk.net/#!casp-tools-checklists/c18f8>. [Accessed 02 Aug 2020].  
42  
43 [15] Moher, D., Liberati, A., Tetzlaff, J. and Altman, D.G. (2009). Preferred reporting items for  
44 systematic reviews and meta-analyses: The PRISMA statement. *PLOS Med*, 6(7).  
45  
46 [16] Bober, J., Stefanov, D., Paladino, L., Sinert, R and Jennifer, C. (2017) The role of health insurance  
47 in paediatric ambulance use: are children just small adults?, *Open Access Text*.  
48  
49 [17] Kost, S. and Arruda, J. (2009) Appropriateness of ambulance transportation to a suburban  
50 paediatric emergency department, *Pre-hospital Emergency Care*, 3(3), pp. 187-90.  
51  
52 [18] Miller, M.K., Dowd, D., Gratton, M.C., Cai, J, and Simon, S.D. (2009) Paediatric out of hospital  
53 emergency medical services utilization in Kansas city, Missouri, *Journal of the Society for Academic*  
54 *Emergency Medicine*, 16(6), pp. 526-531  
55  
56 [19] Poryo, M., Burger, M., Wagenpfeil, S., Ziegler, B., Sauer, H., Flotats-Bastardas, M., Grundmann,  
57 U., Zemlin, M. and Meeyer, S. (2019) Assessment of Inadequate use of paediatric emergency medical  
58  
59  
60

1  
2  
3 transport services: the paediatric emergency and ambulance critical evaluation study, *Frontiers in*  
4 *Paediatrics*.

5  
6 [20] Salmi, H., Kuisma, M., Rahiala, E., Laaperi, M. and Harve- Rytsala. (2018) Children in  
7 disadvantaged neighbourhoods have more out of hospital emergencies: a population based study,  
8 *British Medical Journal*, 103(11).

9  
10 [21] Patterson, D., Baxley, E., Probst, J., Hussey, J. and Moore, C. (2006) Medically Unnecessary  
11 Emergency Medical Services (EMS) Transports Among Children Ages 0 to 17 Years, *Maternal and*  
12 *Child Health Journal*, 10, pp. 527-536.

13  
14 [22] Fessler, S.J., Simon, H., Yancey, A.H., Colman, M. and Hirsh, D. (2013) How well do general EMS  
15 911 dispatch protocols predict ED resource utilization for paediatric patients? *The American Journal*  
16 *of Emergency Medicine*, 32(3), pp. 199-202.

17  
18 [23] Watts, J., Cowden, J.D., Cupertino, A.P., Dowd, M.D. and Kennedy, C. (2011) 911: Spanish  
19 speaking parents perspectives on prehospital emergency care for children, *Journal of Immigrant and*  
20 *Minority Health*, 13(3), pp. 526-32.

21  
22 [24] Wilkinson, D. and Heinz, P. (2014) Paediatric emergency ambulance transport: who calls 999  
23 and why? *British Medical Journal*, (99)1.

24  
25 [25] Sinclair, D. (2007) Emergency Department overcrowding- implications for paediatric emergency  
26 medicine, *Paediatric Child Health*, 12(6), pp. 491-494.

27  
28 [26] Champagne, Langabeer, T., Langabeer, J.R., Roberts, K.E., Gross, J.S., Gleisberg, G.R., Gonzalez,  
29 M.G. and Persse, D. (2019) Telehealth impact on primary care related ambulance transports,  
30 *Prehospital Emergency Care*, 23(5), pp. 712-717.

31  
32 [27] Dejean, D., Giacomini, M., Welsford, M., Schwartz, L. and Deciccs, P. (2016) Inappropriate  
33 ambulance use: a qualitative study of paramedics' views, *Healthcare Policy*, 11(30), pp. 67-79.

34  
35 [28] Camasso- Richardson, K., Wilde, J.A. and Petrack, E.M (1991) Medically unnecessary paediatric  
36 ambulance transports: a medical taxi service? *Academic Emergency Medicine*, 4(12), pp. 1137-41.

37  
38 [29] Unwin, M., Kinsman, L. and Rigby, S. (2016) Why are we waiting? Patients' perspectives for  
39 accessing emergency department services with non-urgent complaints, *International Emergency*  
40 *Nursing*, 29, pp. 3-8.

41  
42 [30] Eastwood, K., Morgans, A., Smith, K., Hodgkinson, A., Becker, G. and Stoelwinder, J. (2016) A  
43 novel approach for managing the growing demand for the ambulance services by low acuity  
44 patients, *Australian Health Review*, 40(4), pp. 378-384.

45  
46 [31] Richards, M.E., Hubble, M.W., Burke, S. (2011) Inappropriate paediatric emergency medical  
47 services utilisation redefined, *Paediatric Emergency Care*, 27(6), 514-8.

48  
49 [32] Sprivulis, P., Grainger, S., Nagree, Y. (2005) Ambulance diversion is not associated with low  
50 acuity patients attending Perth metropolitan emergency departments, *Emergency Medicine*  
51 *Australasia*, 17(1), pp. 11-5.

52  
53 [33] Gregory, E.F., Chamberlain, J.M., Teach, S.J., Engstrom, R. and Mathison, D.J. (2017) Geographic  
54 variation in the use of low acuity paediatric emergency medical services, *Paediatric Emergency Care*,  
55 33(2), pp. 73-79.

- 1  
2  
3 [34] Blundell, K. and Abrahamson, E. (2015) Inappropriate ambulance use in paediatrics, *British*  
4 *Medical Journal*, 100(3).  
5  
6 [35] Langer, S., Chew-Graham, C. and Hunter, C. (2013) Why do patients with long-term conditions  
7 use unscheduled care? A qualitative literature review. *Health Social Care Community*, 21, pp. 339–  
8 51.  
9  
10 [36] Berry, A., Brousseau, D., Brotanek, J., Tomany-Korman, S. and Flores, G. (2008) Why do parents  
11 bring children to the emergency department for non-urgent conditions? A qualitative study.  
12 *Ambulatory Paediatric*, 8(6), 360-7.  
13  
14 [37] Butun, A., Linden, M., Lynn, F. and McGaughey, J. (2018) Exploring parents' reasons for  
15 attending the emergency department for children with minor illnesses: a mixed methods systematic  
16 review, *Emergency Medical Journal*, pp. 1-8.  
17  
18 [38] Fieldston, E.S., Alpern, E.R., Nadel, F.M. (2012) A qualitative assessment of reasons for non-  
19 urgent visits to the emergency department: parent and health professional opinions. *Paediatric*  
20 *Emergency Care*, (28), pp. 220- 225.  
21  
22 [39] Rucker, D.W., Edwards, R.A. and Burstin, H.R (1997) Patient-specific predictors of ambulance  
23 use. *Annals of Emergency Medicine*, 28, pp. 484–91  
24  
25 [40] Kawakami, C., Ohshige, K. and Kubota, K. (2007) Influence of socioeconomic factors on  
26 medically unnecessary ambulance calls. *BMC Health Services Research*, 7(120).  
27  
28 [41] Ahl, C., Nyström, M. and Jansson L (2006) Making up one's mind: patients' experiences of calling  
29 an ambulance. *Accident Emergency Nursing*, 14, pp. 11–19.  
30  
31 [42] Durant, E. and Fahimi, J (2012) Factors associated with ambulance use among patient with low-  
32 acuity conditions. *Prehospital Emergency Care*, 16, pp. 329–37  
33  
34 - Figure 1 PRISMA flowchart to be inputted on page 7, reference [15].  
35  
36  
37  
38  
39  
40  
41  
42  
43  
44  
45  
46  
47  
48  
49  
50  
51  
52  
53  
54  
55  
56  
57  
58  
59  
60

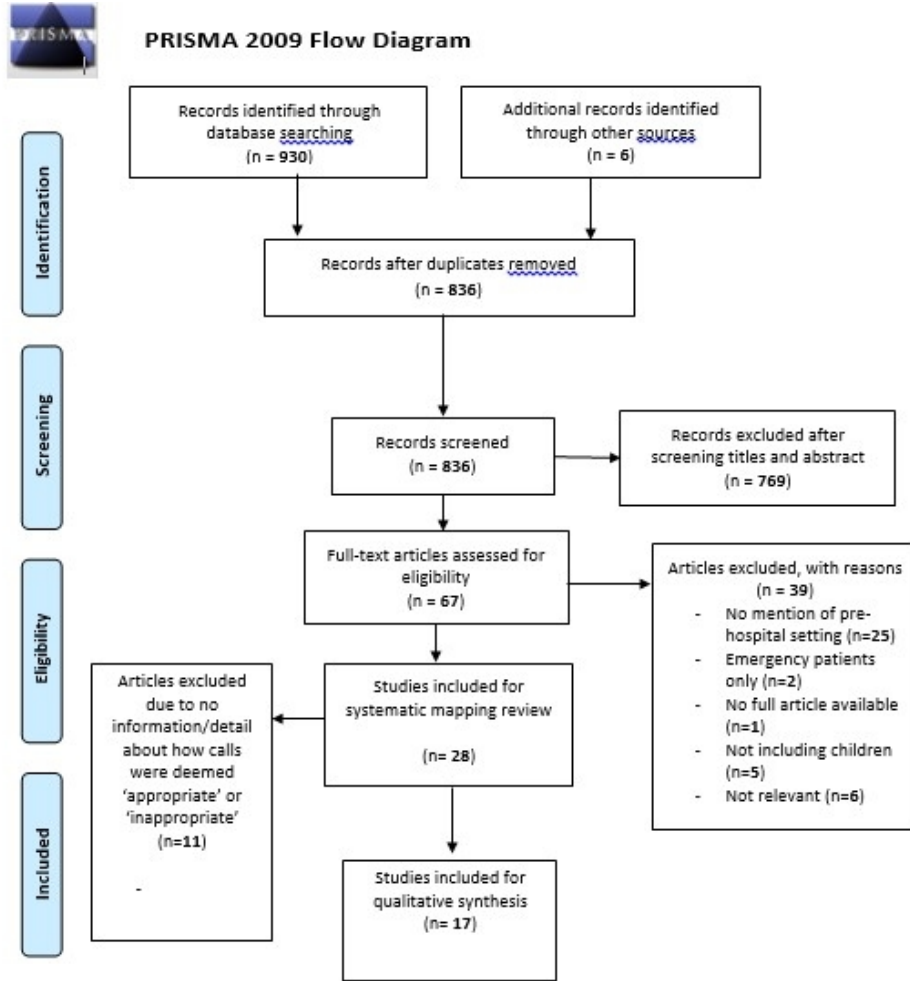

PRISMA flow diagram

145x143mm (96 x 96 DPI)

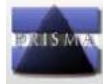

# PRISMA 2009 Checklist

| Section/topic                      | #  | Checklist item                                                                                                                                                                                                                                                                                              | Reported on page # |
|------------------------------------|----|-------------------------------------------------------------------------------------------------------------------------------------------------------------------------------------------------------------------------------------------------------------------------------------------------------------|--------------------|
| <b>TITLE</b>                       |    |                                                                                                                                                                                                                                                                                                             |                    |
| Title                              | 1  | Identify the report as a systematic review, meta-analysis, or both.                                                                                                                                                                                                                                         | 1                  |
| <b>ABSTRACT</b>                    |    |                                                                                                                                                                                                                                                                                                             |                    |
| Structured summary                 | 2  | Provide a structured summary including, as applicable: background; objectives; data sources; study eligibility criteria, participants, and interventions; study appraisal and synthesis methods; results; limitations; conclusions and implications of key findings; systematic review registration number. | 2                  |
| <b>INTRODUCTION</b>                |    |                                                                                                                                                                                                                                                                                                             |                    |
| Rationale                          | 3  | Describe the rationale for the review in the context of what is already known.                                                                                                                                                                                                                              | 3                  |
| Objectives                         | 4  | Provide an explicit statement of questions being addressed with reference to participants, interventions, comparisons, outcomes, and study design (PICOS).                                                                                                                                                  | 1,3                |
| <b>METHODS</b>                     |    |                                                                                                                                                                                                                                                                                                             |                    |
| Protocol and registration          | 5  | Indicate if a review protocol exists, if and where it can be accessed (e.g., Web address), and, if available, provide registration information including registration number.                                                                                                                               | 1,3,4              |
| Eligibility criteria               | 6  | Specify study characteristics (e.g., PICOS, length of follow-up) and report characteristics (e.g., years considered, language, publication status) used as criteria for eligibility, giving rationale.                                                                                                      | 3,4                |
| Information sources                | 7  | Describe all information sources (e.g., databases with dates of coverage, contact with study authors to identify additional studies) in the search and date last searched.                                                                                                                                  | 4                  |
| Search                             | 8  | Present full electronic search strategy for at least one database, including any limits used, such that it could be repeated.                                                                                                                                                                               | 4,7                |
| Study selection                    | 9  | State the process for selecting studies (i.e., screening, eligibility, included in systematic review, and, if applicable, included in the meta-analysis).                                                                                                                                                   | 4,5                |
| Data collection process            | 10 | Describe method of data extraction from reports (e.g., piloted forms, independently, in duplicate) and any processes for obtaining and confirming data from investigators.                                                                                                                                  | 5,6                |
| Data items                         | 11 | List and define all variables for which data were sought (e.g., PICOS, funding sources) and any assumptions and simplifications made.                                                                                                                                                                       | 5                  |
| Risk of bias in individual studies | 12 | Describe methods used for assessing risk of bias of individual studies (including specification of whether this was done at the study or outcome level), and how this information is to be used in any data synthesis.                                                                                      | 5,6                |
| Summary measures                   | 13 | State the principal summary measures (e.g., risk ratio, difference in means).                                                                                                                                                                                                                               |                    |
| Synthesis of results               | 14 | Describe the methods of handling data and combining results of studies, if done, including measures of consistency (e.g., $I^2$ ) for each meta-analysis.                                                                                                                                                   | 5,6                |



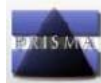

# PRISMA 2009 Checklist

| Section/topic                 | #  | Checklist item                                                                                                                                                                                           | Reported on page # |
|-------------------------------|----|----------------------------------------------------------------------------------------------------------------------------------------------------------------------------------------------------------|--------------------|
| Risk of bias across studies   | 15 | Specify any assessment of risk of bias that may affect the cumulative evidence (e.g., publication bias, selective reporting within studies).                                                             | 5,6                |
| Additional analyses           | 16 | Describe methods of additional analyses (e.g., sensitivity or subgroup analyses, meta-regression), if done, indicating which were pre-specified.                                                         | 5,6                |
| <b>RESULTS</b>                |    |                                                                                                                                                                                                          |                    |
| Study selection               | 17 | Give numbers of studies screened, assessed for eligibility, and included in the review, with reasons for exclusions at each stage, ideally with a flow diagram.                                          | 6,7                |
| Study characteristics         | 18 | For each study, present characteristics for which data were extracted (e.g., study size, PICOS, follow-up period) and provide the citations.                                                             | 6                  |
| Risk of bias within studies   | 19 | Present data on risk of bias of each study and, if available, any outcome level assessment (see item 12).                                                                                                |                    |
| Results of individual studies | 20 | For all outcomes considered (benefits or harms), present, for each study: (a) simple summary data for each intervention group (b) effect estimates and confidence intervals, ideally with a forest plot. | 7,8,9,10,11        |
| Synthesis of results          | 21 | Present results of each meta-analysis done, including confidence intervals and measures of consistency.                                                                                                  |                    |
| Risk of bias across studies   | 22 | Present results of any assessment of risk of bias across studies (see Item 15).                                                                                                                          |                    |
| Additional analysis           | 23 | Give results of additional analyses, if done (e.g., sensitivity or subgroup analyses, meta-regression [see Item 16]).                                                                                    |                    |
| <b>DISCUSSION</b>             |    |                                                                                                                                                                                                          |                    |
| Summary of evidence           | 24 | Summarize the main findings including the strength of evidence for each main outcome; consider their relevance to key groups (e.g., healthcare providers, users, and policy makers).                     | 12                 |
| Limitations                   | 25 | Discuss limitations at study and outcome level (e.g., risk of bias), and at review-level (e.g., incomplete retrieval of identified research, reporting bias).                                            | 14                 |
| Conclusions                   | 26 | Provide a general interpretation of the results in the context of other evidence, and implications for future research.                                                                                  | 14                 |
| <b>FUNDING</b>                |    |                                                                                                                                                                                                          |                    |
| Funding                       | 27 | Describe sources of funding for the systematic review and other support (e.g., supply of data); role of funders for the systematic review.                                                               | 15                 |

From: Moher D, Liberati A, Tetzlaff J, Altman DG, The PRISMA Group (2009). Preferred Reporting Items for Systematic Reviews and Meta-Analyses: The PRISMA Statement. PLoS Med 6(7): e1000097. doi:10.1371/journal.pmed1000097

For more information, visit: [www.prisma-statement.org](http://www.prisma-statement.org).



# BMJ Open

## What factors are associated with ambulance use for non-emergency problems in children? A systematic mapping review and qualitative synthesis

|                                 |                                                                                                                                                                                                                                                     |
|---------------------------------|-----------------------------------------------------------------------------------------------------------------------------------------------------------------------------------------------------------------------------------------------------|
| Journal:                        | <i>BMJ Open</i>                                                                                                                                                                                                                                     |
| Manuscript ID                   | bmjopen-2021-049443.R1                                                                                                                                                                                                                              |
| Article Type:                   | Original research                                                                                                                                                                                                                                   |
| Date Submitted by the Author:   | 28-Jul-2021                                                                                                                                                                                                                                         |
| Complete List of Authors:       | Proctor, Alysha; University of the West of England, Baxter, Helen; University of Bristol, Bristol Medical School: Population Health Sciences; University of Bristol Booker, Matthew; University of Bristol, School of Social and Community Medicine |
| <b>Primary Subject Heading</b>: | Emergency medicine                                                                                                                                                                                                                                  |
| Secondary Subject Heading:      | Paediatrics                                                                                                                                                                                                                                         |
| Keywords:                       | PAEDIATRICS, ACCIDENT & EMERGENCY MEDICINE, GENERAL MEDICINE (see Internal Medicine)                                                                                                                                                                |
|                                 |                                                                                                                                                                                                                                                     |

SCHOLARONE™  
Manuscripts



I, the Submitting Author has the right to grant and does grant on behalf of all authors of the Work (as defined in the below author licence), an exclusive licence and/or a non-exclusive licence for contributions from authors who are: i) UK Crown employees; ii) where BMJ has agreed a CC-BY licence shall apply, and/or iii) in accordance with the terms applicable for US Federal Government officers or employees acting as part of their official duties; on a worldwide, perpetual, irrevocable, royalty-free basis to BMJ Publishing Group Ltd ("BMJ") its licensees and where the relevant Journal is co-owned by BMJ to the co-owners of the Journal, to publish the Work in this journal and any other BMJ products and to exploit all rights, as set out in our [licence](#).

The Submitting Author accepts and understands that any supply made under these terms is made by BMJ to the Submitting Author unless you are acting as an employee on behalf of your employer or a postgraduate student of an affiliated institution which is paying any applicable article publishing charge ("APC") for Open Access articles. Where the Submitting Author wishes to make the Work available on an Open Access basis (and intends to pay the relevant APC), the terms of reuse of such Open Access shall be governed by a Creative Commons licence – details of these licences and which [Creative Commons](#) licence will apply to this Work are set out in our licence referred to above.

Other than as permitted in any relevant BMJ Author's Self Archiving Policies, I confirm this Work has not been accepted for publication elsewhere, is not being considered for publication elsewhere and does not duplicate material already published. I confirm all authors consent to publication of this Work and authorise the granting of this licence.

**TITLE:**

What factors are associated with ambulance use for non-emergency problems in children? A systematic mapping review and qualitative synthesis

**AUTHORS:**

Alyesha Proctor<sup>1</sup>, Helen Baxter<sup>2</sup>, Matthew Booker<sup>2</sup>

<sup>1</sup>Faculty of Health and Applied Sciences, University of the West of England, Glenside Campus (1H14), Blackberry Hill, Bristol, BS16 1DD, England

<sup>2</sup> Centre for Academic Primary Care, Bristol Medical School, University of Bristol, Whatley Road, Bristol, BS8 2PS, England

<sup>1</sup>alyesha.proctor@uwe.ac.uk (Advanced Paramedic Practitioner, Senior Lecturer, UWE)

<sup>2</sup>matthew.booker@bristol.ac.uk (Academic GP, NIHR Clinical Lecturer, Bristol Medical School)

<sup>2</sup>helen.baxter@bristol.ac.uk (Knowledge Mobilisation Research Fellow, Bristol Medical School)

\*corresponding author address: Alyesha Proctor, Glenside Campus, Blackberry Hill, Stapleton, Bristol, BS16 1DD.

## ABSTRACT:

### **Objective:**

To explore what factors are associated with ambulance use for non-emergency problems in children.

**Design:** This study is a systematic mapping review and qualitative synthesis of published journal articles and grey literature. Searches were conducted on the following databases, for articles published between January 1980 and July 2020: MEDLINE, EMBASE, PsycINFO, CINAHL and AMED. A Google Scholar and a Web of Science search were undertaken to identify reports or proceedings not indexed in the above. Book chapters and theses were searched via the OpenSigle, EThOS and DART databases. A literature advisory group, including experts in the field, were contacted for relevant grey literature and unpublished reports. The inclusion criteria incorporated articles published in the English language reporting findings for the reasons behind why there are so many calls to the ambulance service for non-urgent problems in children. Data extraction was divided into two stages: extraction of data to generate a broad systematic literature 'map', and extraction of data from highly relevant papers utilising qualitative methods to undertake a focused qualitative synthesis. An initial table of themes associated with reasons for non-emergency calls to the ambulance for children formed the 'thematic map' element. The uniting feature running through all of the identified themes was the determination of 'inappropriateness' or 'appropriateness' of an ambulance call out, which was then adopted as the concept of focus for our qualitative synthesis.

### **Results:**

Four themes were developed in the systematic mapping stage; socio-economic status/geographical location, practical reasons, fear of consequences and parental education. Three analytical themes were developed in the qualitative synthesis stage including practicalities and logistics of obtaining care, arbitrary scoring system and retrospection.

### **Conclusions:**

There is a lack of public and caregiver understanding about the use of ambulances for paediatrics. There are factors that appear specific to choosing ambulance care for children that are not so prominent in adults (fever, reassurance, fear of consequences). Future areas for attention to decrease ambulance activation for paediatric low acuity complaints were highlighted as: identifying strategies for helping care-givers to mitigate perceived risk, increasing availability of primary care, targeted education to particular geographical areas, education to first time parents with infants, and providing alternate means of transportation.

**PROSPERO registration:** PROSPERO 2019 CRD42019160395

### **Strengths and limitations of the study:**

#### *Strengths:*

- The review is highly inclusive, including a range of global study settings, including qualitative, quantitative and mixed methods research.
- This is the first mapping review specifically exploring ambulance use among paediatrics with problems that could be managed in primary care.

#### *Limitations:*

- There is little evidence available addressing the specific question, reflected in the small number of studies suitable to the review criteria.
- Much of the data is retrospective and therefore often incomplete and not recorded accurately.
- Because of the limited evidence, the analysis is limited in areas.

## INTRODUCTION:

Despite an increasing range of urgent care options in the community, calls to the ambulance service continue to rise for 'non-emergency' problems [1]. This is particularly apparent with calls to paediatric patients, which could be due to a multitude of factors [2]. There is an absence of literature describing the factors associated with non-urgent ambulance/Emergency Medical Services (EMS) use for children [3]. Demand for health services is increasing, and understanding patient motivations to seek healthcare may assist the development of demand management strategies [4].

Growing numbers of people using emergency ambulances is leading to rising costs and increased pressure on resources[1], and are increasingly for calls that could be managed by an alternative healthcare provider (e.g. primary care), that may be better placed to offer a time-or-resource optimised response. Often, these calls are referred to in policy documents and academic literature as 'inappropriate', however, it is unclear if and *how* the concept of 'inappropriate' service use applies when considering children and ambulance calls. Previous work has focussed on exploring and reducing 'inappropriate' use of ambulances, however the definition of 'inappropriate' is complex and nuanced (e.g. [5]). Literature exploring 'inappropriate' ambulance use for *adults* shows that unsuitable use is often determined by healthcare professionals retrospectively [6]. Classifying calls as 'inappropriate' fails to recognise the context of the request for help and may be unhelpful for developing practical resolutions [7].

There is an array of evidence exploring why adults use EMS for non-emergency problems, suggesting that patients define circumstances worthy of emergency health resources according to socioemotional factors, rather than for the symptoms underlying their illness [4]. Reasons for children accessing emergency ambulances for non-emergency problems may be different to that of adults, particularly as calls are almost always made by a third-party. Given the demands placed on overstretched ambulance resources, it is important to understand why parents and carers call 999 for their children with non-emergency problems. For the purposes of this review, 'non-emergency' problems refers to illnesses or circumstances where immediate treatment/intervention of a potentially life threatening condition is *not* required, for example calls that could be managed more appropriately in a primary care setting.

To our knowledge, there is no current systematic review exploring the drivers behind ambulance requests for children with non-emergency problems. Therefore, this review seeks to explore what is currently understood about the factors associated with ambulance use for non-emergency problems in children. The findings will be used to inform emerging interventions to more appropriately manage calls to the ambulance service for non-emergency problems in children.

## METHODS:

We undertook a systematic mapping review and qualitative synthesis of published journal articles and relevant grey literature, exploring the question 'What factors are associated with ambulance use

for non-emergency problems in children?' A systematic map is a review methodology often used in health services research that aims to 'map out' and categorise literature on a specific topic with an aim of this developing into more comprehensive work [8], and is often used in health services research [9]. This methodology is particularly beneficial for summarising and organising a broad and varied evidence base, to identify a focus for more specific investigation [10].

### **Search Strategy:**

Searches were conducted on the following databases, for articles published between January 1980 and July 2020: MEDLINE, EMBASE, PsycINFO, CINAHL and AMED. A Google Scholar and a Web of Science search were undertaken to identify reports or proceedings not indexed in the above. Book chapters and theses were searched via the OpenSigle, EThOS and DART databases. A literature advisory group, including experts in the field, were contacted for relevant grey literature and unpublished reports. The database resources were selected, as they include the key medical databases. OpenGrey was used as the source for grey literature, as it covers the relevant subject areas for this review and has open access to over 700, 000 bibliographic references. Search terms were developed iteratively by discussion among the research team and a librarian, seeking a balance between comprehensiveness and focus. A combination of MeSH terms and synonym text-strings/phrases were used in the search strategy, and were combined using Boolean operators. The full review protocol and search strategy was published prospectively in the PROSPERO register (registration reference PROSPERO 2019 CRD42019160395). Update searches were re-run before final analysis, and again prior to submission.

### **Search Terms:**

| <b>Ambulance</b>          | <b>Non-emergency</b> | <b>Children</b> |
|---------------------------|----------------------|-----------------|
| Pre-hospital              | Non-urgent           | Child           |
| Prehospital               | Minor                | Pediatric       |
| Paramedic                 | Primary care         | Paediatric      |
| Out of Hospital           | Non-serious          | Baby            |
| 999                       | Low acuity           | Babies          |
| EMT                       | Routine              | Infant          |
| EMS                       |                      | Schoolchild     |
| Emergency Medical Service |                      | Adolescent      |
| Emergency Call            |                      | Teenager        |
|                           |                      | Young person    |
|                           |                      | Parent          |
|                           |                      | Mother          |
|                           |                      | Father          |
|                           |                      | Neonate         |

### **Inclusion and Exclusion Criteria:**

The inclusion and exclusion criteria incorporated articles published in the English language between January 1980 and July 2020, reporting findings for the reasons behind why there are so many calls to the ambulance service for non-urgent problems in children. There were no restrictions on the types of study included in the systematic literature mapping stage of the review (Phase A). Due to the minimal qualitative research available, all articles were screened to identify whether they were suitable to be included in the qualitative synthesis stage of the review (Phase B). Studies were included if they had alluded to what was deemed as an 'inappropriate' or 'appropriate' call to the

ambulance service. The 'WHO' definition of a 'child' was used for this review of international evidence: a child is defined as a person 19 years or younger unless national law defines a person to be an adult at an earlier age [11]. The papers reviewed were limited to English language studies, due to resource restrictions and the cost of translation. The systematic review included a wide range of primary research, to capture all relevant evidence. It was thought that limiting the search period to 1980 was likely to identify all, but a small minority of research completed before this time. Studies that reported purely on routine primary care or community care without any involvement of the ambulance service, or only on situations, illnesses or circumstances where immediate treatment/intervention of a potentially life-threatening condition was required, or studies that reported purely on attendance to the emergency department if there was no mention of the pre-hospital phase, were excluded.

| Inclusion Criteria                                                                                                                          | Exclusion Criteria                                                                                                                                                 |
|---------------------------------------------------------------------------------------------------------------------------------------------|--------------------------------------------------------------------------------------------------------------------------------------------------------------------|
| Calls to the ambulance service                                                                                                              | Studies that report purely on routine primary care or community care without any involvement of the ambulance service                                              |
| Non-emergency problems                                                                                                                      | Studies that report purely situations, illnesses or circumstances where immediate treatment/intervention of a potentially life threatening condition was required. |
| A child under 19 years of age                                                                                                               | A person older than 19 years of age                                                                                                                                |
| English Language studies                                                                                                                    | Studies that report purely on attendance to the Emergency Department if there is no mention of the pre-hospital phase                                              |
| Primary quantitative, qualitative and mixed methods research                                                                                |                                                                                                                                                                    |
| Grey Literature                                                                                                                             |                                                                                                                                                                    |
| Date of publication 1980- present                                                                                                           |                                                                                                                                                                    |
| Studies were included if they had alluded to what was deemed as an 'inappropriate' or 'appropriate' call to the ambulance service (Phase B) |                                                                                                                                                                    |

#### **Extracting, Coding, Synthesising and Analysing the Data:**

Data extraction was divided into two stages:

*Phase A:* extraction of data to generate a broad systematic literature 'map', and;

*Phase B:* extraction of data from highly relevant papers utilising qualitative methods to undertake a focused qualitative synthesis.

A thematic synthesis was undertaken, following the approach described by Thomas and Harden [12]. An initial table of themes associated with reasons for non-emergency calls to the ambulance service for children formed the 'thematic map' element (Phase A). The 'thematic mapping' element was high level, due to the heterogeneity of the studies in setting, methodology and focus. The uniting feature running through all of the identified themes was the determination of 'inappropriateness' or 'appropriateness' of an ambulance call out, and this formed the specific concept of focus for the qualitative synthesis (Phase B).

Owing to the inclusive nature of this review, and lack of relevant literature, it was decided to include findings from studies of all methodologies. Firstly, standard author, background, methods, findings/conclusions and limitations were extracted and inserted into a table. Following this, key messages for the mapping stage (Phase A) were extracted and included in the table. Verification was undertaken independently by other members of the research team and regular research meetings were held during the data extraction process; any disagreement was resolved by consensus discussion. For the qualitative synthesis (Phase B), papers from Phase A were screened, and reasons for inclusion or exclusion for this phase were also detailed in the table. *Phase A:*

In keeping with previously published work in this area [13], an inductive coding frame was developed to map emerging concepts. The key messages of all studies included at this stage (qualitative and quantitative) were extracted from the results/conclusions section, along with the methodology, where they were applicable to an ambulance service, and included non-emergency calls for children. After independently producing a series of pilot categories based on a sample of papers, the research team met to form consensus on category. Duplicate coding by another researcher took place on a sample of the papers, such that all the main themes were double coded. A summary literature map including the key themes was produced at this point.

#### *Phase B:*

All papers deemed appropriate for the systematic mapping process (Phase A) were deemed eligible for entry into the thematic synthesis stage (Phase B). Of these, papers were screened for detail regarding how a call was deemed 'inappropriate' or 'appropriate', to identify eligibility. Due to a very limited number of qualitative journal articles, all methodologies were included. Working from a theoretical foundation of critical realism, a thematic synthesis of the qualitative literature was undertaken. This process was divided into the three stages described by Thomas and Harden [12]: line-by-line textual coding, generation of descriptive themes, and final formulation of analytical themes to take the understanding beyond the primary studies alone, and develop new interpretive constructs to provide greater understanding. Data from the results and discussion/conclusion sections of the included papers were individually coded. Each paper was then text-coded line-by-line, to generate a bank of translational codes. Papers were independently coded by members of the research team. Descriptive themes were generated for these translational codes, and were verified amongst the researchers in the team, with any disagreement resolved by consensus discussion.

There are a range of methodological approaches to handling and analysing data extracted under the 'phenomena on interest and context' model as part of a qualitative synthesis. These include metatheoretical and metaethnographic approaches that draw upon grounded theory and follow 'lines-of-argument' in the synthesis of 'key concepts', and critical interpretive methods resulting in synthetic constructs [14]. Whilst these approaches are most commonly applied to purely qualitative datasets, we draw on the evolving approach of an 'integrated design' of reviewing mixed-method primary data (as opposed to the contrasting approaches of a sequential or cyclical design [15, 16] whereby the methodological differences in qualitative and quantitative data are minimised, allowing them to be treated as producing findings that can be readily synthesised because they assess the same fundamental research question or purpose. By extracting and codifying the results and discussions sections of all our included studies, we treat the data at this level as 'equivalent in purpose' under this premise. Furthermore – and in keeping with concept of a 'data-based convergent synthesis approach' [17] only one synthesis takes place with all included study designs – in our analysis, this is thematic.

#### ***Assessment of Quality:***



Due to the inherent complexity in characterising 'quality' of the included studies, quality assessment was undertaken with the primary aim of informing the interpretation of the synthesis, rather than to exclude studies on the grounds of quality alone. All relevant studies were included in Phase A of the review without formal quality appraisal. Phase B used a modified version of the 10 point CASP tool. The CASP checklist is often utilised for quality assessment in qualitative syntheses, encouraging assessment of a paper against several items related to the purpose, design, conduct and reporting of qualitative research. The modified version of the CASP checklist used in this synthesis has been optimised by other authors specifically for quality appraisal as part of qualitative evidence synthesis [18]. It includes prompts that help assess the paradigmatic congruence of included papers with their methods, methodologies and conceptual framework. This is in addition to the broader overall appropriateness of the qualitative methodology, credibility, transferability, dependability and confirmability, including detail of the reporting. No studies were excluded on assessment of quality grounds.

### Patient and public involvement:

Lack of resources prohibited the use of a designated patient and public group for this study. However, the research question was informed by engagement with members of the public and professionals in on going emergency care research.

### RESULTS:

A total of 936 articles were identified in the initial searching process. After duplicates were removed, the total number of records screened was 836. After screening titles and abstracts 769 articles were then excluded, which left 67 full-text articles to be assessed for eligibility by two members of the research team, independently. Of these, 39 articles were excluded for reasons including: no mention of the pre-hospital setting, included confirmed emergency patients only, no full article available, did not include children or was not relevant. Therefore, 28 articles were used in the systematic mapping review (Phase A) (n=21 quantitative, n=2 mixed methods, n=2 qualitative and n=2 literature reviews).

The Phase A papers were then read in detail to assess for any information regarding how the authors deemed calls to be 'appropriate' or 'inappropriate'. Eleven articles were excluded, due to no reference to the concept of 'appropriateness', leaving 17 articles for the qualitative synthesis stage of the review (Phase B) (n=13 quantitative, n=1 mixed methods, n=2 qualitative and n=1 literature review) [See Figure 1, PRISMA Flow chart] [19].

### **Phase A: Systematic Map: What factors are associated with ambulance use for non-emergency problems in children?**

A summary literature map including key themes was produced (table 1), followed by the development of categories (table 2).

| <i>Table 1 to show key themes for reasons associated with non-urgent calls to the ambulance service for children</i> |
|----------------------------------------------------------------------------------------------------------------------|
| 1. Geographical area (urban areas associated with more calls for non-urgent presentations)                           |
| 2. Lack of availability to be seen in primary care (both actual and perceived)                                       |
| 3. Uninsured patients (USA)                                                                                          |
| 4. Infants (under 1s)                                                                                                |
| 5. Level of parental education (including status and medical knowledge)                                              |

|                                                                                                                                   |
|-----------------------------------------------------------------------------------------------------------------------------------|
| 6. Lower socioeconomic area                                                                                                       |
| 7. Lack of understanding of the pre-hospital care system (unsure what qualifies for 'appropriate' ambulance call for their child) |
| 8. Parent perceived emergency- fever                                                                                              |
| 9. No other means of transportation                                                                                               |
| 10. First time parents                                                                                                            |
| 11. Parental unemployment                                                                                                         |
| 12. Schools                                                                                                                       |
| 13. Parental anxiety (particularly in higher socioeconomic areas)                                                                 |
| 14. Feeling of helplessness (particularly bystanders)                                                                             |

*Table 2 to Show Categories of Key Themes*

| <b>Socioeconomic status/Geographical</b> | <b>Practical reasons</b>                        | <b>Fear of consequences</b>                  | <b>Level of parental education</b>                    |
|------------------------------------------|-------------------------------------------------|----------------------------------------------|-------------------------------------------------------|
| Geographical area-urban                  | Lack of availability to be seen in primary care | Infants under 1 year                         | Status e.g. no degree                                 |
| Uninsured (USA)                          | No other means of transport                     | Schools                                      | Lack of understanding of the pre-hospital care system |
| Lower socioeconomic area                 |                                                 | Parental anxiety (higher socioeconomic area) |                                                       |
| Parental unemployment                    |                                                 | Feeling of helplessness                      | Perceived emergency                                   |
|                                          |                                                 |                                              | First time parents                                    |

*Socioeconomic status and geographical location:*

Several studies have found a significant link between location and non-emergency calls to the ambulance for children; in particular, urban areas were associated with more ambulance use [3, 20]. One study assessing the 'appropriateness' of ambulance use in paediatrics presenting to the Emergency Department (ED) identified a higher rate of what the authors termed as 'misuse' of ambulances for children in urban populations, and suggested that suburban parents would be less likely to call the ambulance 'inappropriately'. The authors wrote that suburban locations have lower rates of 'misuse', since they are accustomed to coming to the hospital via private vehicle [21].

One North American retrospective study found that parents with children in areas with lower income used EMS more frequently, and repetitively (11% called the ambulance more than once in the three years). The authors reported a significant linear relationship between transport rate and family income by postcode [22]. In a German study, medium socioeconomic status was associated with the lowest percentage of non-emergency calls to the ambulance service for children. There were several 'inappropriate' calls due to what the authors described as 'over anxiety' of parents in high socioeconomic areas, however this was still not as many as in the lower socioeconomic areas [23]. Salmi *et al.* [24] aimed to explore whether the socioeconomic status of a neighbourhood could predict the incidence of paediatric out of hospital emergencies in Finland, and concluded that poorer neighbourhoods significantly increased ambulance use for children.

1  
2  
3 Several studies reported that Medicaid patients account for the majority of non-emergency calls to  
4 the ambulance for children; 43% of patients were insured by Medicaid, (the United States federal  
5 and state program that helps with medical costs for people with limited income) and 60% of what  
6 the authors termed as 'unnecessary' calls were to those without commercial insurance [21]. Further  
7 studies also concluded that non-insured paediatric patients had significantly higher rates of  
8 ambulance use compared to those who were privately insured [20, 23, 25].  
9

#### 10 11 *Level of parental education:*

12  
13 The most common presenting complaint for 'inappropriate' ambulance use in children was fever;  
14 nearly half of the calls for fever in children were deemed non-emergency and an unnecessary use of  
15 the ambulance [21]. Ninety-two percent of children who were conveyed via ambulance to the ED  
16 with these symptoms were discharged home with no intervention [26]. The authors concluded that  
17 parents overestimate the seriousness of fever, and that parents are often unsure as to what qualifies  
18 as an emergency requiring an ambulance for their children [27].  
19

20  
21 A prospective single centre cohort study conducted in Germany aimed to provide current data on  
22 the 'inappropriate' use of ambulances for children and explore the reasons why. The main factor  
23 was parental perceived emergency, particularly with first time parents [23], which was a common  
24 finding in other studies [28]. A lower paternal and maternal educational status resulted in  
25 significantly more EMS use. Speculatively, the authors suggest that parents with low income have  
26 poorer medical knowledge and this is associated with 'inappropriate' use of ambulances- 'A lack of  
27 basic medical knowledge and experience in the proper assessment of children appears to be a  
28 contributing factor to inappropriate ambulance use for non-urgent problems'. Lower parental  
29 education or 'inadequate parental health literacy' as the authors write, seems to be associated with  
30 more calls internationally, and of these calls, more are low acuity [24].  
31  
32

#### 33 34 *Practical reasons:*

35  
36 Shah *et al.* [3] identified a link between increased EMS use for non-emergency problems in children  
37 if there was limited availability in Primary Care health services. Similarly Sinclair [29] found there  
38 was an increase in ambulance use due to lack of access to primary care physicians in the community,  
39 and lack of community support for children.  
40

41  
42 A common reason identified in the studies for parents calling an ambulance for non-emergency  
43 problems is lack of transport to take their child to the ED [30, 31]. This was particularly the case for  
44 single parents [2]. Kost and Arruda [21] report that parents admitted that they called the ambulance  
45 if there was no other means of transportation or if they had other childcare considerations; 'they  
46 would have used a taxi or shuttle if they could'. Similarly, one study found that often parents knew  
47 that an ambulance was not required, however 40% of parents stated they had no other means of  
48 transportation [32]. A descriptive survey study found that parents will call the ambulance for  
49 convenience as well as perceived need [33]. Additionally, one study found that parents believe that  
50 they will be seen faster in ED if they arrive there via ambulance [2].  
51

#### 52 53 *Fear of consequences:*

54  
55 Parents' and care givers' fear of doing the wrong thing ethically and morally, being advised by other  
56 healthcare professionals to follow a certain course of action (e.g. ambulance) even if they felt it  
57 clinically unnecessary, reduced confidence in their own judgement, and not wanting to take any risks  
58 were all common reasons for calling the ambulance for non-urgent problems in children [2]. One  
59 study found that parents of infants (under one) are more likely to utilise the ambulance service [22]  
60

and that parents often overestimate their child's illness [32]. Eastwood *et al.* [34] completed a descriptive epidemiological review in Australia, which showed that often parents call the ambulance for reassurance. As far as schools are concerned, the majority of ambulance transport is unjustified; however, schools call for emergency services due to fear of consequences, which poses an area of potential relief for the ambulance service which is already stretched to its limits [28]. Heightened anxiety due to previous experiences of traumatic events also resulted in 'inappropriate' calls to the ambulance [2].

**Phase B: Qualitative Synthesis: How are calls to the ambulance service for children deemed 'inappropriate'?**

A total of 15 descriptive themes were developed iteratively by repeated rounds of inductive grouping of codes, until no additional discrete codes were needed to fully describe the dataset (table 3). Through a process informed by the principles of charting, these descriptive themes were then organised and condensed into seven related (i.e. not mutually exclusive) descriptive thematic groups, by considering the axis of the descriptive themes (table 4). By analysing patterns in the free codes and descriptive themes within and across the seven thematic groups, a number of cross relationships between groups were identified. Through a process of comparing the theme groups and their constituent descriptive themes, three overarching analytical themes were identified and discussed below (table 5).

*Table 3 to show descriptive themes related to how calls to the ambulance for non-urgent problems in children have been deemed inappropriate*

|                                                                                                                                                                                                                                                                                  |
|----------------------------------------------------------------------------------------------------------------------------------------------------------------------------------------------------------------------------------------------------------------------------------|
| 1. Calls are deemed 'appropriate' by ED doctors using predetermined criteria from a Delphi study, such as: requiring CPR, respiratory distress, seizure, altered mental status, unable to walk, admitted to ICU, ambulance called by GP, RTA, parents not available to transport |
| 2. 'Inappropriate' if the main reason for the call was due to lack of transport                                                                                                                                                                                                  |
| 3. 'Inappropriate' if there has been no intervention/investigation/treatment in ED or by paramedics                                                                                                                                                                              |
| 4. Appropriateness determined using the Emergency Severity Index                                                                                                                                                                                                                 |
| 5. Classed as 'Inappropriate' if not an acute onset of symptoms                                                                                                                                                                                                                  |
| 6. Determined by ED doctors with varying levels of qualification – the more experience the clinician, the more they thought calls were 'Inappropriate'                                                                                                                           |
| 7. Parental perception of 'non-life threatening' associated with 'Inappropriate' calls                                                                                                                                                                                           |
| 8. 'Inappropriate' calls associated with not calling the GP first (if patients have tried this and exhausted alternative options than can be deemed as more appropriate)                                                                                                         |
| 9. Appropriateness was often based on vital signs                                                                                                                                                                                                                                |
| 10. Deemed 'Inappropriate' if assigned 'non-urgent' at triage in ED                                                                                                                                                                                                              |
| 11. Deemed 'Inappropriate' if could be managed more suitably in primary care                                                                                                                                                                                                     |
| 12. Australian Triage Score (if scores 4 or 5 then deemed non-urgent and inappropriate use)                                                                                                                                                                                      |
| 13. Deemed as non-urgent if it was safe to use alternative transport                                                                                                                                                                                                             |
| 14. Deemed non-urgent if the condition is unlikely to deteriorate or require admission/surgery                                                                                                                                                                                   |
| 15. 'Appropriate' if 'lights and sirens' are used                                                                                                                                                                                                                                |

*Table 4 to show thematic groups of how calls were determined to be 'inappropriate':*

|                                   |
|-----------------------------------|
| Determined by clinicians          |
| Determined retrospectively        |
| Determined on the level of acuity |
| Determined using a scoring system |

|                                                                                         |
|-----------------------------------------------------------------------------------------|
| Determined because of practical reasons, such as no transport and not contacting the GP |
| Determined because the problem would be more suitably managed in primary care           |
| Determined because of speaking to a GP first                                            |

*Table 5 to show analytical themes*

|                                                |
|------------------------------------------------|
| Practicalities and logistics of obtaining care |
| Arbitrary scoring system                       |
| Retrospection                                  |

The practicalities and logistics of obtaining care domain, contains descriptive themes relating to the practical reasons for determining ‘inappropriate’ use of an ambulance, including themes associated with convenience, access issues and transport. The arbitrary scoring system domain brings together descriptive themes concerning the use of scoring tools to determine whether a call to the ambulance is ‘inappropriate’ or not. The retrospection domain refers to the descriptive themes relating to calls being deemed as ‘inappropriate’ retrospectively by clinicians, for example after vital signs have been taken.

*Practicalities and logistics of obtaining care:*

Many of the themes identified that calls were considered to be ‘inappropriate’ because of practical aspects, logistical difficulties and convenience. In one study parents and care givers had called an ambulance solely due to having no other means of transportation, this was deemed as an ‘inappropriate’ use of the ambulance service [32]. The authors identified that 40% of parents admitted to calling the ambulance due to having no transport, and of those 80% were considered ‘inappropriate’. Other studies determined ‘inappropriate’ ambulance use if it was safe to use alternative transport [35, 30, 31].

Several studies suggested that parents and caregivers use ambulances for convenience and this is ‘inappropriate’ [32], particularly if the complaint could be suitably managed in primary care [36]. Parental perception of the situation as non-life threatening was associated with ‘inappropriate’ use of the ambulance service, where parents and caregivers actually expressed that ambulance transportation is more convenient, if not strictly a necessity at times [23]. ‘Inappropriate’ use of ambulances was associated with parents and care givers not calling a GP first when indicated (non-life-threatening medical need) [23], and when they sought advice from a GP first, the use of emergency services was considered more ‘appropriate’ [27]. Equally, calls to the ambulance for children were deemed ‘appropriate’ if patients had tried to access their GP, but that system has failed them [31].

*Arbitrary scoring system:*

Several studies sought to determine ‘inappropriateness’ using semi-objective arbitrary scoring or coding systems. Kost and Arruda[21] analysed records retrospectively and deemed ambulance transport unnecessary unless the medical record included any of the following criteria: Cardiopulmonary Resuscitation, respiratory distress, immobilisation, inability to walk, admission to Intensive care Unit, ambulance recommended by medical personnel, Road Traffic Collision, or parents not on scene. The authors considered these criteria to be more liberal than others. In Bober *et al.* [20] study, Accident and Emergency doctors considered 61% of paediatric arrivals by ambulance as ‘unnecessary’. The doctors determined ‘appropriateness’ using the emergency severity index levels (a validated triage tool used in the ED), which has been used in other studies

1  
2  
3 [37]. Similarly calls to the ambulance have been thought of as 'inappropriate' if they were deemed  
4 as non-emergency at triage in the ED [32]. Other tools used to determine 'appropriateness' is the  
5 Australian triage score[33]; if children scored 4 or 5 (non-urgent) then the call was thought to be'  
6 'inappropriate'.  
7

#### 8 *Retrospection:*

9  
10 The majority of studies sought to determine 'inappropriateness' retrospectively, normally by a  
11 variety of different clinicians. This is an important consideration, as this suggests that the call can  
12 only be deemed 'inappropriate' after the consultation process and diagnosis. In a German study,  
13 calls were determined to be an 'inadequate' or 'adequate' use of the ambulance service by three  
14 doctors of different seniority [23]. Interestingly, there were significant differences in what the three  
15 doctors considered to be 'inappropriate' calls to the ambulance service and this was dependent on  
16 experience; the more experienced doctor reported more calls to be 'inappropriate'. Similarly,  
17 'appropriate' use of the ambulance service in one study was determined by a doctor, based primarily  
18 on chief complaint, general appearance, vital signs, and ambulance patient report forms, which  
19 concluded that 61% of ambulance calls to children were 'inappropriate' [32]. A US study involving  
20 children utilised medical necessity criteria agreed at a consensus conference, to make an assessment  
21 on 'appropriateness', and concluded that 16.4% of all transports were an unnecessary use of the  
22 ambulance [25].  
23  
24  
25  
26

27 A qualitative study interviewing paramedics on what they considered to be the 'appropriate' use of  
28 the ambulance service concluded that a call is 'appropriate' if it needed 'lights and sirens' to hospital  
29 and was of a 'life threatening' nature [31]. Calls were considered 'inappropriate' if there had been no  
30 ambulance intervention [21], unless the child was under two years old [38], or if there was not an  
31 acute onset of symptoms [23]. It is clear that 'fever' as a presenting complaint is considered the  
32 most 'appropriate' use of ambulances for children by clinicians according to the literature [35].  
33  
34  
35  
36

#### 37 **DISCUSSION:**

38  
39 This systematic review involved a two-stage process exploring which factors are associated with  
40 ambulance use for non-emergency problems in children, and how 'inappropriateness' in non-urgent  
41 ambulance use in children has been determined. The reasons for parents and care givers calling 999  
42 for their children with non-emergency conditions are complex and multifaceted. This review reveals  
43 an intricate relationship between the urgency of the clinical problem and the 'appropriateness' of  
44 ambulance service use. To our knowledge, there is no review exploring the factors associated with  
45 non-emergency ambulance use in children. An important consideration across the identified factors,  
46 which was illustrated by the systematic map (Phase A) was how to determine 'appropriateness' or  
47 not. Undertaking a thematic synthesis enabled the research team to go beyond the individual  
48 frameworks that each paper had used to determine this, and combined to the knowledge to identify  
49 gain understanding on the 'concept' of 'inappropriateness' in non-emergency ambulance use in  
50 children.  
51  
52  
53

#### 54 *Systematic Map:*

55  
56 Previous work examines how help-seeking may apply to some urgent care settings, such as EDs [39,  
57 40]. It is apparent that some parents will bring their child to the ED for non-urgent care, due to  
58 perceived difficulties with contacting their GP, and the presumed advantages of ED care. Findings  
59 from this review also suggest that parents call the ambulance for non-emergency problems due to  
60



1  
2  
3 perceived barriers for accessing their GP, and speed of access. The studies in the review suggested  
4 that perceived problems with primary healthcare services were affecting parents' and caregivers'  
5 use of the ED and ambulance services for minor illness. Convenience was also a reason highlighted in  
6 the studies for parents attending the ED [41]. Perceived urgency was a main theme identified in this  
7 study and is also the most frequently cited reason for visiting the ED by parents of children  
8 presenting with non-urgent issues [41]. Often, parents felt that their child's condition constituted a  
9 genuine emergency, but did not necessarily require an ambulance, which was called due to lack of  
10 transportation. First-time parents, and children under one year were common reasons for non-  
11 emergency calls to the ambulance service, which aligns with other studies on presentation at EDs,  
12 which was increased among parents of newborns and first-time parents [42].

13  
14  
15  
16 Aligning with previous studies focused on adults, our findings show that increased ambulance use  
17 for non-urgent problems in children is conceptually associated with lower socio-economical urban  
18 locations [43]. In addition, this review identified that uninsured children (US studies) was an  
19 associating factor for non-emergency ambulance use, which has also been reported in previous  
20 studies of adults [25]. Another common motivator is lack of transport, which is a factor also  
21 identified in the non-emergency use of ambulance services with adults [44]. The socio-demographic  
22 factors of rurality, deprivation and education may warrant further investigation to understand the  
23 underlying factors behind this increased use.

24  
25  
26 The most common presenting complaint associated with non-emergency calls to the ambulance  
27 service for children was fever [26]. This suggests an area of parental education that could be  
28 improved in order to reduce non-emergency calls to the ambulance service, and may have  
29 implications to how calls are triaged. This is reported in other studies suggesting that focusing  
30 educational efforts in regards to 'appropriate' ambulance use on the adolescent population will  
31 likely reduce 'inappropriate' ambulance use in the paediatric population [20]. Additionally, further  
32 exploration at the ambulance triage and dispatch stage for children may be beneficial [20]. Fear of  
33 the consequences among parents and care-givers where children are concerned is a clear factor in  
34 increased ambulance use, however, parental concern could be a legitimate triage discriminator.  
35 Recurring messages in other literature also portrays patient and carer uncertainty around urgency,  
36 the fear of harm if treatment is delayed and the value placed on clinical assessment for reassurance  
37 [45]. The findings of this review indicate that parents and carers often do not know exactly what  
38 type of help they need when they contact urgent care services, or what constitutes a need for an  
39 emergency ambulance for their child [23]. Providing parents with the knowledge about what  
40 constitutes emergency and non-emergency care for typical infantile diseases could help with  
41 parents' decision making.

#### 42 43 44 45 46 *Qualitative synthesis:*

47  
48 The assessment of 'inappropriateness' of an ambulance contact is multifaceted and diverse in the  
49 evidence, which is a result of methodological limitations and conceptual variation. According to the  
50 evidence 'Inappropriate' use of the ambulance service for children is at a similarly high level to that  
51 of the adult population [21]. The majority of studies sought to determine 'inappropriateness'  
52 retrospectively, using semi-objective (yet arbitrary) scoring systems, and almost universally  
53 determined by clinicians following an assessment that included recording of vital signs [46].  
54 However, the assessment of 'appropriateness' based on information obtainable after clinical  
55 assessment will likely overestimate 'inappropriate' use, and disregards the multifaceted psychosocial  
56 context of the demand for help, which is even greater when concerning children. Authors have  
57 suggested that there is not enough information in the 'diagnostic label' alone to judge whether a call  
58 is 'appropriate' or not [5].  
59  
60

1  
2  
3 Clearly, one of the issues with deeming a call to be 'inappropriate' is how this is classified differently  
4 by professionals, compared to the lay public [4]. The higher the acuity, the greater it seems to be  
5 considered as 'appropriate' by clinicians. However, there are no hard and fast criteria; for example,  
6 'those needing lights and sirens' is still a personal judgement. It seems that if a *clinician* thinks it is an  
7 urgent call, then it is 'appropriate' but what is urgent to a clinician can be different to the general  
8 public. Indeed, as reflected in the findings from the current study, previous literature suggests  
9 differences between clinician classifications of emergency (based on physiological measures) are in  
10 contrast with patient-based determinations of emergency, (often defined by practical factors or fear  
11 of consequences).

12  
13  
14 There is suggestion that calls are 'inappropriate' if there is no ambulance intervention, however this  
15 is arguable because patients often benefit from rapid transportation, particularly children [21]. Calls  
16 were deemed as 'inappropriate' if other transport options or other services were available and more  
17 suitable [30]. In other work, studies have shown that patients and carers 'weigh up' how practical  
18 the use of the ambulance service (or alternatives) are for their perceived needs, and sometimes  
19 patients genuinely expect the ambulance service to treat minor ailments [7]. This shows a lack of  
20 public and caregiver understanding about the use of ambulances for paediatrics.

#### 21 22 23 24 25 26 *Limitations:*

27 The heterogeneity of study methodologies presents a challenge in drawing together associated and  
28 conflicting findings. There is little evidence available addressing the specific question, reflected in  
29 the small number of studies suitable to the review criteria. Because of the limited evidence, the  
30 analysis is limited in areas. Much of the data is retrospective and therefore often incomplete and not  
31 recorded accurately. All included studies in this review were carried out in wealthy countries. It is  
32 likely that many of the issues will remain the same for low-income countries, however some will be  
33 unique given the variability in cultural, economic and political contexts. By limiting our searches to  
34 the English language, we may have inadvertently excluded important sources.

#### 35 36 37 38 39 40 **CONCLUSION AND FUTURE RESEARCH:**

41 There is a lack of public and caregiver understanding about the use of ambulances for paediatrics.  
42 There are some factors that appear specific to choosing ambulance care for children that are not so  
43 prominent in adults (fever, reassurance, fear of consequences) and there are some ways in which  
44 'appropriateness' might be looked at differently for children and adults. Further primary, qualitative  
45 research is required to explore parents, care givers, teachers and young teenagers' reasons for  
46 calling the ambulance for non-emergency problems in children. Providing alternate means of  
47 transportation, strategies for helping care givers to mitigate perceived risk, increasing the perception  
48 and reality of access to urgent primary care or targeted education to certain residential areas and  
49 first time parents with infants (particularly regarding fever), may decrease unnecessary ambulance  
50 activation for paediatric low acuity complaints. Most studies included were conducted in high-  
51 income countries, subsequently there is a need for further investigation among low-income  
52 countries, which may provide important and unique insights. Future interventions could be designed  
53 to impact parents' decision making prior to calling an ambulance for their child. Both policy makers  
54 and academics need to work towards a contextually-nuanced and consistent definition of  
55 'appropriate' ambulance resource use.  
56  
57  
58  
59  
60



**Word Count (excluding tables, titles, references):**

5300

**Keywords:**

Systematic review; non-emergency; ambulance; children; qualitative synthesis; appropriateness

**Conflict of interest:**

NONE

No support from any organisation for the submitted work; no financial relationships with any organisations that might have an interest in the submitted work in the previous three years, no other relationships or activities that could appear to have influenced the submitted work.

**Copyright:**

The Corresponding Author has the right to grant on behalf of all authors and does grant on behalf of all authors, an exclusive licence (or non-exclusive for government employees) on a worldwide basis to the BMJ Publishing Group Ltd to permit this article (if accepted) to be published in BMJ editions and any other BMJPGJL products and sublicenses such use and exploit all subsidiary rights, as set out in our licence.

**Transparency statement:**

This manuscript is an honest, accurate and transparent account of the study being reported. No important aspects of the study have been omitted and any discrepancies from the study as originally planned have been explained.

**Funding source:**

MB is funded by an NIHR Clinical Lecturer Post

**Data sharing:**

No additional data available

**Contributor statement:**

MB developed the original idea and supervised the work. AP conducted the review and took a lead on writing the manuscript. All authors interpreted and analysed the results. All authors discussed the results and contributed to the final manuscript. HB finalised approval of the version to be published.

**Ethical Statement:**

Not required

**REFERENCES:**

- [1] NHS England (2013) High quality care for all, now and for future generations: Transforming urgent and emergency care services in England. Available at: <https://www.england.nhs.uk/wp-content/uploads/2013/06/urg-emerg-care-ev-bse.pdf> [Accessed 30 July 2020].
- [2] O’Cathain, A., Connel, J., Long, J. and Coster, J. (2019) ‘Clinically unnecessary’ use of emergency and urgent care: A realist review of patients’ decision making. *Health Expectations*, 23(1).
- [3] Shah, M.N., Cushman, J.T., Davis, J. Bazarian, J., Auinger, P, and Friedman, B. (2008) The epidemiology of emergency medical services use by children: an analysis of the national hospital ambulatory medical care survey, *Prehospital Emergency Care*, 12(3), pp. 269-76.
- [4] Morgans, A. and Burgess, S.J. (2011) What is a health emergency? The difference in definition and understanding between patients and health professionals. *Australian Health Review*, 35(3), pp. 284-289.
- [5] Snooks, H., Wrigley, H. and George, S. (1998) Appropriateness of use of emergency ambulances. *Journal of Accident Emergency Medicine*, 15, pp. 212–18.
- [6] Durand, A.C., Palazzolo, S., Hardouin, N.T., Gerbeaux, P., Sambuz, R., and Gentile, S. (2012) Nonurgent patients in emergency departments: rational or irresponsible consumers? Perceptions of professionals and patients. *BMC Research Notes*, 5(525).
- [7] Booker, M.J., Purdy, S. and Shaw, A.R.G. (2017) Seeking ambulance treatment for ‘primary care’ problems: a qualitative systematic review of patient, carer and professional perspectives. *BMJ Open*.
- [8] Grant, M.J. and Booth, A. A. (2009) Typology of reviews: an analysis of 14 review types and associated methodologies. *Health Info Library*, 26(91).
- [9] Oakley, A., Gough, D. and Oliver, S. (2005) The politics and evidence of methodology: lessons from the EPPI-Centre. *Evid Policy*, 1(5).
- [10] Pope, C., Mays, N. and Popay, J. (2007) *Synthesizing qualitative and quantitative health evidence: a guide to methods*. Berkshire, England: Open University Press.
- [11] World Health Organisation (2020) *Definition of Key Terms*. Available at <https://www.who.int/hiv/pub/guidelines/arv2013/intro/keyterms/en/> [Accessed 02/08/20].
- [12] Thomas, J. and Harden, A. (2008) Methods for the thematic synthesis of qualitative research in systematic reviews. *BMC Med Res Methodology*, 8(45).
- [13] Campbell, R., Pound, P., Pope, C., Britten, N., Pill, R., Morgan, M., et al. (2003). Evaluating meta-ethnography: a synthesis of qualitative research on lay experiences of diabetes and diabetes care. *Social Science & Medicine*, 56, pp. 671-684.
- [14] Dixon-Woods, M., Cavers, D. and Agarwal, S. (2006) Conducting a critical interpretive synthesis of the literature on access to healthcare by vulnerable groups. *BMC Med Res Methodol*, pp. 35–47.
- [15] Sandelowski, M., Voils, C.I. and Barroso, J. (2006) Defining and designing mixed research synthesis studies. *Res Sch*, pp. 13:29.
- [16] Heyvaert, M., Hannes, K. and Onghena, P. (2016) *Using mixed-methods research synthesis for literature reviews*. New York: Sage Publications.

- 1  
2  
3 [17] Hong, Q.N., Pluye, P. and Bujold, M. (2017) Convergent and sequential synthesis designs:  
4 implications for conducting and reporting systematic reviews of qualitative and quantitative  
5 evidence. *Syst Rev*, pp. 6:61.  
6  
7 [18] Long, H.A., French, D.P. and Brooks, J.M. (2020) Optimising the value of the critical appraisal  
8 skills programme (CASP) tool for quality appraisal in qualitative evidence synthesis. *Research*  
9 *Methods in Medicine and Health Sciences*, 1(1).  
10  
11 [19] Moher, D., Liberati, A., Tetzlaff, J. and Altman, D.G. (2009). Preferred reporting items for  
12 systematic reviews and meta-analyses: The PRISMA statement. *PLOS Med*, 6(7).  
13  
14 [20] Bober, J., Stefanov, D., Paladino, L., Sinert, R and Jennifer, C. (2017) The role of health insurance  
15 in paediatric ambulance use: are children just small adults?, *Open Access Text*.  
16  
17 [21] Kost, S. and Arruda, J. (2009) Appropriateness of ambulance transportation to a suburban  
18 paediatric emergency department, *Pre-hospital Emergency Care*, 3(3), pp. 187-90.  
19  
20 [22] Miller, M.K., Dowd, D., Gratton, M.C., Cai, J, and Simon, S.D. (2009) Paediatric out of hospital  
21 emergency medical services utilization in Kansas city, Missouri, *Journal of the Society for Academic*  
22 *Emergency Medicine*, 16(6), pp. 526-531  
23  
24 [23] Poryo, M., Burger, M., Wagenpfeil, S., Ziegler, B., Sauer, H., Flotats-Bastardas, M., Grundmann,  
25 U., Zemlin, M. and Meeyer, S. (2019) Assessment of Inadequate use of paediatric emergency medical  
26 transport services: the paediatric emergency and ambulance critical evaluation study, *Frontiers in*  
27 *Paediatrics*.  
28  
29 [24] Salmi, H., Kuisma, M., Rahiala, E., Laaperi, M. and Harve- Rytsala. (2018) Children in  
30 disadvantaged neighbourhoods have more out of hospital emergencies: a population based study,  
31 *British Medical Journal*, 103(11).  
32  
33 [25] Patterson, D., Baxley, E., Probst, J., Hussey, J. and Moore, C. (2006) Medically Unnecessary  
34 Emergency Medical Services (EMS) Transports Among Children Ages 0 to 17 Years, *Maternal and*  
35 *Child Health Journal*, 10, pp. 527-536.  
36  
37 [26] Fessler, S.J., Simon, H., Yancey, A.H., Colman, M. and Hirsh, D. (2013) How well do general EMS  
38 911 dispatch protocols predict ED resource utilization for paediatric patients? *The American Journal*  
39 *of Emergency Medicine*, 32(3), pp. 199-202.  
40  
41 [27] Watts, J., Cowden, J.D., Cupertino, A.P., Dowd, M.D. and Kennedy, C. (2011) 911: Spanish  
42 speaking parents perspectives on prehospital emergency care for children, *Journal of Immigrant and*  
43 *Minority Health*, 13(3), pp. 526-32.  
44  
45 [28] Wilkinson, D. and Heinz, P. (2014) Paediatric emergency ambulance transport: who calls 999  
46 and why? *British Medical Journal*, (99)1.  
47  
48 [29] Sinclair, D. (2007) Emergency Department overcrowding- implications for paediatric emergency  
49 medicine, *Paediatric Child Health*, 12(6), pp. 491-494.  
50  
51 [30] Champagne, Langabeer, T., Langabeer, J.R., Roberts, K.E., Gross, J.S., Gleisberg, G.R., Gonzalez,  
52 M.G. and Persse, D. (2019) Telehealth impact on primary care related ambulance transports,  
53 *Prehospital Emergency Care*, 23(5), pp. 712-717.  
54  
55 [31] Dejean, D., Giacomini, M., Welsford, M., Schwartz, L. and Deciccs, P. (2016) Inappropriate  
56 ambulance use: a qualitative study of paramedics' views, *Healthcare Policy*, 11(30), pp. 67-79.  
57  
58  
59  
60

- 1  
2  
3 [32] Camasso- Richardson, K., Wilde, J.A. and Petrack, E.M (1991) Medically unnecessary paediatric  
4 ambulance transports: a medical taxi service? *Academic Emergency Medicine*, 4(12), pp. 1137-41.  
5  
6 [33] Unwin, M., Kinsman, L. and Rigby, S. (2016) Why are we waiting? Patients' perspectives for  
7 accessing emergency department services with non-urgent complaints, *International Emergency*  
8 *Nursing*, 29, pp. 3-8.  
9  
10 [34] Eastwood, K., Morgans, A., Smith, K., Hodgkinson, A., Becker, G. and Stoelwinder, J. (2016) A  
11 novel approach for managing the growing demand for the ambulance services by low acuity  
12 patients, *Australian Health Review*, 40(4), pp. 378-384.  
13  
14 [35] Richards, M.E., Hubble, M.W., Burke, S. (2011) Inappropriate paediatric emergency medical  
15 services utilisation redefined, *Paediatric Emergency Care*, 27(6), pp. 514-8.  
16  
17 [36] Sprivulis, P., Grainger, S., Nagree, Y. (2005) Ambulance diversion is not associated with low  
18 acuity patients attending Perth metropolitan emergency departments, *Emergency Medicine*  
19 *Australasia*, 17(1), pp. 11-5.  
20  
21 [37] Gregory, E.F., Chamberlain, J.M., Teach, S.J., Engstrom, R. and Mathison, D.J. (2017) Geographic  
22 variation in the use of low acuity paediatric emergency medical services, *Paediatric Emergency Care*,  
23 33(2), pp. 73-79.  
24  
25 [38] Blundell, K. and Abrahamson, E. (2015) Inappropriate ambulance use in paediatrics, *British*  
26 *Medical Journal*, 100(3).  
27  
28 [39] Langer, S., Chew-Graham, C. and Hunter, C. (2013) Why do patients with long-term conditions  
29 use unscheduled care? A qualitative literature review. *Health Social Care Community*, 21, pp. 339–  
30 51.  
31  
32 [40] Berry, A., Brousseau, D., Brotanek, J., Tomany-Korman, S. and Flores, G. (2008) Why do parents  
33 bring children to the emergency department for non-urgent conditions? A qualitative study.  
34 *Ambulatory Paediatric*, 8(6), pp. 360-7.  
35  
36 [41] Butun, A., Linden, M., Lynn, F. and McGaughey, J. (2018) Exploring parents' reasons for  
37 attending the emergency department for children with minor illnesses: a mixed methods systematic  
38 review, *Emergency Medical Journal*, pp. 1-8.  
39  
40 [42] Fieldston, E.S., Alpern, E.R., Nadel, F.M. (2012) A qualitative assessment of reasons for non-  
41 urgent visits to the emergency department: parent and health professional opinions. *Paediatric*  
42 *Emergency Care*, (28), pp. 220- 225.  
43  
44 [43] Rucker, D.W., Edwards, R.A. and Burstin, H.R (1997) Patient-specific predictors of ambulance  
45 use. *Annals of Emergency Medicine*, 28, pp. 484–91  
46  
47 [44] Kawakami, C., Ohshige, K. and Kubota, K. (2007) Influence of socioeconomic factors on  
48 medically unnecessary ambulance calls. *BMC Health Services Research*, 7(120).  
49  
50 [45] Ahl, C., Nyström, M. and Jansson L (2006) Making up one's mind: patients' experiences of calling  
51 an ambulance. *Accident Emergency Nursing*, 14, pp. 11–19.  
52  
53 [46] Durant, E. and Fahimi, J (2012) Factors associated with ambulance use among patient with low-  
54 acuity conditions. *Prehospital Emergency Care*, 16, pp. 329–37  
55  
56  
57  
58  
59  
60

- Figure 1 PRISMA flowchart to be inputted on page 7, reference [19].



PRISMA flow diagram

145x143mm (96 x 96 DPI)

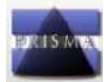

# PRISMA 2009 Checklist

| Section/topic                      | #  | Checklist item                                                                                                                                                                                                                                                                                              | Reported on page # |
|------------------------------------|----|-------------------------------------------------------------------------------------------------------------------------------------------------------------------------------------------------------------------------------------------------------------------------------------------------------------|--------------------|
| <b>TITLE</b>                       |    |                                                                                                                                                                                                                                                                                                             |                    |
| Title                              | 1  | Identify the report as a systematic review, meta-analysis, or both.                                                                                                                                                                                                                                         | 1                  |
| <b>ABSTRACT</b>                    |    |                                                                                                                                                                                                                                                                                                             |                    |
| Structured summary                 | 2  | Provide a structured summary including, as applicable: background; objectives; data sources; study eligibility criteria, participants, and interventions; study appraisal and synthesis methods; results; limitations; conclusions and implications of key findings; systematic review registration number. | 2                  |
| <b>INTRODUCTION</b>                |    |                                                                                                                                                                                                                                                                                                             |                    |
| Rationale                          | 3  | Describe the rationale for the review in the context of what is already known.                                                                                                                                                                                                                              | 3                  |
| Objectives                         | 4  | Provide an explicit statement of questions being addressed with reference to participants, interventions, comparisons, outcomes, and study design (PICOS).                                                                                                                                                  | 1,3                |
| <b>METHODS</b>                     |    |                                                                                                                                                                                                                                                                                                             |                    |
| Protocol and registration          | 5  | Indicate if a review protocol exists, if and where it can be accessed (e.g., Web address), and, if available, provide registration information including registration number.                                                                                                                               | 2                  |
| Eligibility criteria               | 6  | Specify study characteristics (e.g., PICOS, length of follow-up) and report characteristics (e.g., years considered, language, publication status) used as criteria for eligibility, giving rationale.                                                                                                      | 4,5                |
| Information sources                | 7  | Describe all information sources (e.g., databases with dates of coverage, contact with study authors to identify additional studies) in the search and date last searched.                                                                                                                                  | 4,5                |
| Search                             | 8  | Present full electronic search strategy for at least one database, including any limits used, such that it could be repeated.                                                                                                                                                                               | Sup file           |
| Study selection                    | 9  | State the process for selecting studies (i.e., screening, eligibility, included in systematic review, and, if applicable, included in the meta-analysis).                                                                                                                                                   | 4,5                |
| Data collection process            | 10 | Describe method of data extraction from reports (e.g., piloted forms, independently, in duplicate) and any processes for obtaining and confirming data from investigators.                                                                                                                                  | 5,6                |
| Data items                         | 11 | List and define all variables for which data were sought (e.g., PICOS, funding sources) and any assumptions and simplifications made.                                                                                                                                                                       | 5                  |
| Risk of bias in individual studies | 12 | Describe methods used for assessing risk of bias of individual studies (including specification of whether this was done at the study or outcome level), and how this information is to be used in any data synthesis.                                                                                      | 5,6                |
| Summary measures                   | 13 | State the principal summary measures (e.g., risk ratio, difference in means).                                                                                                                                                                                                                               | 4,5,6              |
| Synthesis of results               | 14 | Describe the methods of handling data and combining results of studies, if done, including measures of consistency (e.g., $I^2$ ) for each meta-analysis.                                                                                                                                                   | 5,6                |

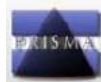

# PRISMA 2009 Checklist

| Section/topic                 | #  | Checklist item                                                                                                                                                                                           | Reported on page # |
|-------------------------------|----|----------------------------------------------------------------------------------------------------------------------------------------------------------------------------------------------------------|--------------------|
| Risk of bias across studies   | 15 | Specify any assessment of risk of bias that may affect the cumulative evidence (e.g., publication bias, selective reporting within studies).                                                             | 5,6                |
| Additional analyses           | 16 | Describe methods of additional analyses (e.g., sensitivity or subgroup analyses, meta-regression), if done, indicating which were pre-specified.                                                         | 5,6                |
| <b>RESULTS</b>                |    |                                                                                                                                                                                                          |                    |
| Study selection               | 17 | Give numbers of studies screened, assessed for eligibility, and included in the review, with reasons for exclusions at each stage, ideally with a flow diagram.                                          | 6,7                |
| Study characteristics         | 18 | For each study, present characteristics for which data were extracted (e.g., study size, PICOS, follow-up period) and provide the citations.                                                             | 6                  |
| Risk of bias within studies   | 19 | Present data on risk of bias of each study and, if available, any outcome level assessment (see item 12).                                                                                                | 6,7                |
| Results of individual studies | 20 | For all outcomes considered (benefits or harms), present, for each study: (a) simple summary data for each intervention group (b) effect estimates and confidence intervals, ideally with a forest plot. | 7,8,9,10,11        |
| Synthesis of results          | 21 | Present results of each meta-analysis done, including confidence intervals and measures of consistency.                                                                                                  | 9,10,11,12         |
| Risk of bias across studies   | 22 | Present results of any assessment of risk of bias across studies (see Item 15).                                                                                                                          | N/A                |
| Additional analysis           | 23 | Give results of additional analyses, if done (e.g., sensitivity or subgroup analyses, meta-regression [see Item 16]).                                                                                    | N/A                |
| <b>DISCUSSION</b>             |    |                                                                                                                                                                                                          |                    |
| Summary of evidence           | 24 | Summarize the main findings including the strength of evidence for each main outcome; consider their relevance to key groups (e.g., healthcare providers, users, and policy makers).                     | 13,14              |
| Limitations                   | 25 | Discuss limitations at study and outcome level (e.g., risk of bias), and at review-level (e.g., incomplete retrieval of identified research, reporting bias).                                            | 14                 |
| Conclusions                   | 26 | Provide a general interpretation of the results in the context of other evidence, and implications for future research.                                                                                  | 14                 |
| <b>FUNDING</b>                |    |                                                                                                                                                                                                          |                    |
| Funding                       | 27 | Describe sources of funding for the systematic review and other support (e.g., supply of data); role of funders for the systematic review.                                                               | 16                 |

From: Moher D, Liberati A, Tetzlaff J, Altman DG, The PRISMA Group (2009). Preferred Reporting Items for Systematic Reviews and Meta-Analyses: The PRISMA Statement. PLoS Med 6(7): e1000097. doi:10.1371/journal.pmed1000097

For more information, visit: [www.prisma-statement.org](http://www.prisma-statement.org).



# BMJ Open

## What factors are associated with ambulance use for non-emergency problems in children? A systematic mapping review and qualitative synthesis

|                                 |                                                                                                                                                                                                                                                     |
|---------------------------------|-----------------------------------------------------------------------------------------------------------------------------------------------------------------------------------------------------------------------------------------------------|
| Journal:                        | <i>BMJ Open</i>                                                                                                                                                                                                                                     |
| Manuscript ID                   | bmjopen-2021-049443.R2                                                                                                                                                                                                                              |
| Article Type:                   | Original research                                                                                                                                                                                                                                   |
| Date Submitted by the Author:   | 10-Sep-2021                                                                                                                                                                                                                                         |
| Complete List of Authors:       | Proctor, Alysha; University of the West of England, Baxter, Helen; University of Bristol, Bristol Medical School: Population Health Sciences; University of Bristol Booker, Matthew; University of Bristol, School of Social and Community Medicine |
| <b>Primary Subject Heading</b>: | Emergency medicine                                                                                                                                                                                                                                  |
| Secondary Subject Heading:      | Paediatrics                                                                                                                                                                                                                                         |
| Keywords:                       | PAEDIATRICS, ACCIDENT & EMERGENCY MEDICINE, GENERAL MEDICINE (see Internal Medicine)                                                                                                                                                                |
|                                 |                                                                                                                                                                                                                                                     |

SCHOLARONE™  
Manuscripts



I, the Submitting Author has the right to grant and does grant on behalf of all authors of the Work (as defined in the below author licence), an exclusive licence and/or a non-exclusive licence for contributions from authors who are: i) UK Crown employees; ii) where BMJ has agreed a CC-BY licence shall apply, and/or iii) in accordance with the terms applicable for US Federal Government officers or employees acting as part of their official duties; on a worldwide, perpetual, irrevocable, royalty-free basis to BMJ Publishing Group Ltd ("BMJ") its licensees and where the relevant Journal is co-owned by BMJ to the co-owners of the Journal, to publish the Work in this journal and any other BMJ products and to exploit all rights, as set out in our [licence](#).

The Submitting Author accepts and understands that any supply made under these terms is made by BMJ to the Submitting Author unless you are acting as an employee on behalf of your employer or a postgraduate student of an affiliated institution which is paying any applicable article publishing charge ("APC") for Open Access articles. Where the Submitting Author wishes to make the Work available on an Open Access basis (and intends to pay the relevant APC), the terms of reuse of such Open Access shall be governed by a Creative Commons licence – details of these licences and which [Creative Commons](#) licence will apply to this Work are set out in our licence referred to above.

Other than as permitted in any relevant BMJ Author's Self Archiving Policies, I confirm this Work has not been accepted for publication elsewhere, is not being considered for publication elsewhere and does not duplicate material already published. I confirm all authors consent to publication of this Work and authorise the granting of this licence.

**TITLE:**

What factors are associated with ambulance use for non-emergency problems in children? A systematic mapping review and qualitative synthesis

**AUTHORS:**

Alyesha Proctor<sup>1</sup>, Helen Baxter<sup>2</sup>, Matthew Booker<sup>2</sup>

<sup>1</sup>Faculty of Health and Applied Sciences, University of the West of England, Glenside Campus (1H14), Blackberry Hill, Bristol, BS16 1DD, England

<sup>2</sup> Centre for Academic Primary Care, Bristol Medical School, University of Bristol, Whatley Road, Bristol, BS8 2PS, England

<sup>1</sup>alyesha.proctor@uwe.ac.uk (Advanced Paramedic Practitioner, Senior Lecturer, UWE)

<sup>2</sup>matthew.booker@bristol.ac.uk (Academic GP, NIHR Clinical Lecturer, Bristol Medical School)

<sup>2</sup>helen.baxter@bristol.ac.uk (Knowledge Mobilisation Research Fellow, Bristol Medical School)

\*corresponding author address: Alyesha Proctor, Glenside Campus, Blackberry Hill, Stapleton, Bristol, BS16 1DD.

## **ABSTRACT:**

### **Objective:**

To explore what factors are associated with ambulance use for non-emergency problems in children.

**Methods:** This study is a systematic mapping review and qualitative synthesis of published journal articles and grey literature. Searches were conducted on the following databases, for articles published between January 1980 and July 2020: MEDLINE, EMBASE, PsycINFO, CINAHL and AMED. A Google Scholar and a Web of Science search were undertaken to identify reports or proceedings not indexed in the above. Book chapters and theses were searched via the OpenSigle, EThOS and DART databases. A literature advisory group, including experts in the field, were contacted for relevant grey literature and unpublished reports. The inclusion criteria incorporated articles published in the English language reporting findings for the reasons behind why there are so many calls to the ambulance service for non-urgent problems in children. Data extraction was divided into two stages: extraction of data to generate a broad systematic literature 'map', and extraction of data from highly relevant papers utilising qualitative methods to undertake a focused qualitative synthesis. An initial table of themes associated with reasons for non-emergency calls to the ambulance for children formed the 'thematic map' element. The uniting feature running through all of the identified themes was the determination of 'inappropriateness' or 'appropriateness' of an ambulance call out, which was then adopted as the concept of focus for our qualitative synthesis.

### **Results:**

There were 28 articles used in the systematic mapping review and 17 in the qualitative synthesis stage of the review. Four themes were developed in the systematic mapping stage; socio-economic status/geographical location, practical reasons, fear of consequences and parental education. Three analytical themes were developed in the qualitative synthesis stage including practicalities and logistics of obtaining care, arbitrary scoring system and retrospection.

### **Conclusions:**

There is a lack of public and caregiver understanding about the use of ambulances for paediatrics. There are factors that appear specific to choosing ambulance care for children that are not so prominent in adults (fever, reassurance, fear of consequences). Future areas for attention to decrease ambulance activation for paediatric low acuity complaints were highlighted as: identifying strategies for helping care-givers to mitigate perceived risk, increasing availability of primary care, targeted education to particular geographical areas, education to first time parents with infants, and providing alternate means of transportation.

**PROSPERO registration:** PROSPERO 2019 CRD42019160395

### **Strengths and limitations of the study:**

#### *Strengths:*

- The review is highly inclusive, including a range of global study settings, including qualitative, quantitative and mixed methods research.
- This is the first mapping review specifically exploring ambulance use among paediatrics with problems that could be managed in primary care.

#### *Limitations:*

- There is little evidence available addressing the specific question, reflected in the small number of studies suitable to the review criteria.
- Much of the data is retrospective and therefore often incomplete and not recorded accurately.
- Because of the limited evidence, the analysis is limited in areas.

## INTRODUCTION:

Despite an increasing range of urgent care options in the community, calls to the ambulance service continue to rise for 'non-emergency' problems [1]. This is particularly apparent with calls to paediatric patients, which could be due to a multitude of factors [2]. There is an absence of literature describing the factors associated with non-urgent ambulance/Emergency Medical Services (EMS) use for children [3]. Demand for health services is increasing, and understanding patient motivations to seek healthcare may assist the development of demand management strategies [4].

Growing numbers of people using emergency ambulances is leading to rising costs and increased pressure on resources[1], and are increasingly for calls that could be managed by an alternative healthcare provider (e.g. primary care), that may be better placed to offer a time-or-resource optimised response. Often, these calls are referred to in policy documents and academic literature as 'inappropriate', however, it is unclear if and *how* the concept of 'inappropriate' service use applies when considering children and ambulance calls. Previous work has focussed on exploring and reducing 'inappropriate' use of ambulances, however the definition of 'inappropriate' is complex and nuanced (e.g. [5]). Literature exploring 'inappropriate' ambulance use for *adults* shows that unsuitable use is often determined by healthcare professionals retrospectively [6]. Classifying calls as 'inappropriate' fails to recognise the context of the request for help and may be unhelpful for developing practical resolutions [7].

There is an array of evidence exploring why adults use EMS for non-emergency problems, suggesting that patients define circumstances worthy of emergency health resources according to socioemotional factors, rather than for the symptoms underlying their illness [4]. Reasons for children accessing emergency ambulances for non-emergency problems may be different to that of adults, particularly as calls are almost always made by a third-party. Given the demands placed on overstretched ambulance resources, it is important to understand why parents and carers call 999 for their children with non-emergency problems. For the purposes of this review, 'non-emergency' problems refers to illnesses or circumstances where immediate treatment/intervention of a potentially life threatening condition is *not* required, for example calls that could be managed more appropriately in a primary care setting.

To our knowledge, there is no current systematic review exploring the drivers behind ambulance requests for children with non-emergency problems. Therefore, this review seeks to explore what is currently understood about the factors associated with ambulance use for non-emergency problems in children. The findings will be used to inform emerging interventions to more appropriately manage calls to the ambulance service for non-emergency problems in children.

## METHODS:

We undertook a systematic mapping review and qualitative synthesis of published journal articles and relevant grey literature, exploring the question 'What factors are associated with ambulance use

for non-emergency problems in children?’ A systematic map is a review methodology often used in health services research that aims to ‘map out’ and categorise literature on a specific topic with an aim of this developing into more comprehensive work [8], and is often used in health services research [9]. This methodology is particularly beneficial for summarising and organising a broad and varied evidence base, to identify a focus for more specific investigation [10].

### **Search Strategy:**

Searches were conducted on the following databases, for articles published between January 1980 and July 2020: MEDLINE, EMBASE, PsycINFO, CINAHL and AMED. A Google Scholar and a Web of Science search were undertaken to identify reports or proceedings not indexed in the above. Book chapters and theses were searched via the OpenSigle, EThOS and DART databases. A literature advisory group, including experts in the field, were contacted for relevant grey literature and unpublished reports. The database resources were selected, as they include the key medical databases. OpenGrey was used as the source for grey literature, as it covers the relevant subject areas for this review and has open access to over 700, 000 bibliographic references. Search terms were developed iteratively by discussion among the research team and a librarian, seeking a balance between comprehensiveness and focus. A combination of MeSH terms and synonym text-strings/phrases were used in the search strategy, and were combined using Boolean operators. The full review protocol and search strategy was published prospectively in the PROSPERO register (registration reference PROSPERO 2019 CRD42019160395). Update searches were re-run before final analysis, and again prior to submission.

### **Search Terms:**

| <b>Ambulance</b>          | <b>Non-emergency</b> | <b>Children</b> |
|---------------------------|----------------------|-----------------|
| Pre-hospital              | Non-urgent           | Child           |
| Prehospital               | Minor                | Pediatric       |
| Paramedic                 | Primary care         | Paediatric      |
| Out of Hospital           | Non-serious          | Baby            |
| 999                       | Low acuity           | Babies          |
| EMT                       | Routine              | Infant          |
| EMS                       |                      | Schoolchild     |
| Emergency Medical Service |                      | Adolescent      |
| Emergency Call            |                      | Teenager        |
|                           |                      | Young person    |
|                           |                      | Parent          |
|                           |                      | Mother          |
|                           |                      | Father          |
|                           |                      | Neonate         |

### **Inclusion and Exclusion Criteria:**

The inclusion and exclusion criteria incorporated articles published in the English language between January 1980 and July 2020, reporting findings for the reasons behind why there are so many calls to the ambulance service for non-urgent problems in children. There were no restrictions on the types of study included in the systematic literature mapping stage of the review (Phase A). Due to the minimal qualitative research available, all articles were screened to identify whether they were suitable to be included in the qualitative synthesis stage of the review (Phase B). Studies were included if they had alluded to what was deemed as an ‘inappropriate’ or ‘appropriate’ call to the

ambulance service. The 'WHO' definition of a 'child' was used for this review of international evidence: a child is defined as a person 19 years or younger unless national law defines a person to be an adult at an earlier age [11]. The papers reviewed were limited to English language studies, due to resource restrictions and the cost of translation. The systematic review included a wide range of primary research, to capture all relevant evidence. It was thought that limiting the search period to 1980 was likely to identify all, but a small minority of research completed before this time. Studies that reported purely on routine primary care or community care without any involvement of the ambulance service, or only on situations, illnesses or circumstances where immediate treatment/intervention of a potentially life-threatening condition was required, or studies that reported purely on attendance to the emergency department if there was no mention of the pre-hospital phase, were excluded.

| Inclusion Criteria                                                                                                                          | Exclusion Criteria                                                                                                                                                 |
|---------------------------------------------------------------------------------------------------------------------------------------------|--------------------------------------------------------------------------------------------------------------------------------------------------------------------|
| Calls to the ambulance service                                                                                                              | Studies that report purely on routine primary care or community care without any involvement of the ambulance service                                              |
| Non-emergency problems                                                                                                                      | Studies that report purely situations, illnesses or circumstances where immediate treatment/intervention of a potentially life threatening condition was required. |
| A child under 19 years of age                                                                                                               | A person older than 19 years of age                                                                                                                                |
| English Language studies                                                                                                                    | Studies that report purely on attendance to the Emergency Department if there is no mention of the pre-hospital phase                                              |
| Primary quantitative, qualitative and mixed methods research                                                                                |                                                                                                                                                                    |
| Grey Literature                                                                                                                             |                                                                                                                                                                    |
| Date of publication 1980- present                                                                                                           |                                                                                                                                                                    |
| Studies were included if they had alluded to what was deemed as an 'inappropriate' or 'appropriate' call to the ambulance service (Phase B) |                                                                                                                                                                    |

#### **Extracting, Coding, Synthesising and Analysing the Data:**

Data extraction was divided into two stages:

*Phase A:* extraction of data to generate a broad systematic literature 'map', and;

*Phase B:* extraction of data from highly relevant papers utilising qualitative methods to undertake a focused qualitative synthesis.

A thematic synthesis was undertaken, following the approach described by Thomas and Harden [12]. An initial table of themes associated with reasons for non-emergency calls to the ambulance service for children formed the 'thematic map' element (Phase A). The 'thematic mapping' element was high level, due to the heterogeneity of the studies in setting, methodology and focus. The uniting feature running through all of the identified themes was the determination of 'inappropriateness' or 'appropriateness' of an ambulance call out, and this formed the specific concept of focus for the qualitative synthesis (Phase B).



Owing to the inclusive nature of this review, and lack of relevant literature, it was decided to include findings from studies of all methodologies. Firstly, standard author, background, methods, findings/conclusions and limitations were extracted and inserted into a table. Following this, key messages for the mapping stage (Phase A) were extracted and included in the table. Verification was undertaken independently by other members of the research team and regular research meetings were held during the data extraction process; any disagreement was resolved by consensus discussion. For the qualitative synthesis (Phase B), papers from Phase A were screened, and reasons for inclusion or exclusion for this phase were also detailed in the table. *Phase A:*

In keeping with previously published work in this area [13], an inductive coding frame was developed to map emerging concepts. The key messages of all studies included at this stage (qualitative and quantitative) were extracted from the results/conclusions section, along with the methodology, where they were applicable to an ambulance service, and included non-emergency calls for children. After independently producing a series of pilot categories based on a sample of papers, the research team met to form consensus on category. Duplicate coding by another researcher took place on a sample of the papers, such that all the main themes were double coded. A summary literature map including the key themes was produced at this point.

#### *Phase B:*

All papers deemed appropriate for the systematic mapping process (Phase A) were deemed eligible for entry into the thematic synthesis stage (Phase B). Of these, papers were screened for detail regarding how a call was deemed 'inappropriate' or 'appropriate', to identify eligibility. Due to a very limited number of qualitative journal articles, all methodologies were included. Working from a theoretical foundation of critical realism, a thematic synthesis of the qualitative literature was undertaken. This process was divided into the three stages described by Thomas and Harden [12]: line-by-line textual coding, generation of descriptive themes, and final formulation of analytical themes to take the understanding beyond the primary studies alone, and develop new interpretive constructs to provide greater understanding. Data from the results and discussion/conclusion sections of the included papers were individually coded. Each paper was then text-coded line-by-line, to generate a bank of translational codes. Papers were independently coded by members of the research team. Descriptive themes were generated for these translational codes, and were verified amongst the researchers in the team, with any disagreement resolved by consensus discussion.

There are a range of methodological approaches to handling and analysing data extracted under the 'phenomena on interest and context' model as part of a qualitative synthesis. These include metatheoretical and metaethnographic approaches that draw upon grounded theory and follow 'lines-of-argument' in the synthesis of 'key concepts', and critical interpretive methods resulting in synthetic constructs [14]. Whilst these approaches are most commonly applied to purely qualitative datasets, we draw on the evolving approach of an 'integrated design' of reviewing mixed-method primary data (as opposed to the contrasting approaches of a sequential or cyclical design [15, 16] whereby the methodological differences in qualitative and quantitative data are minimised, allowing them to be treated as producing findings that can be readily synthesised because they assess the same fundamental research question or purpose. By extracting and codifying the results and discussions sections of all our included studies, we treat the data at this level as 'equivalent in purpose' under this premise. Furthermore – and in keeping with concept of a 'data-based convergent synthesis approach' [17] only one synthesis takes place with all included study designs – in our analysis, this is thematic.

#### ***Assessment of Quality:***

Due to the inherent complexity in characterising 'quality' of the included studies, quality assessment was undertaken with the primary aim of informing the interpretation of the synthesis, rather than to exclude studies on the grounds of quality alone. All relevant studies were included in Phase A of the review without formal quality appraisal. Phase B used a modified version of the 10 point CASP tool. The CASP checklist is often utilised for quality assessment in qualitative syntheses, encouraging assessment of a paper against several items related to the purpose, design, conduct and reporting of qualitative research. The modified version of the CASP checklist used in this synthesis has been optimised by other authors specifically for quality appraisal as part of qualitative evidence synthesis [18]. It includes prompts that help assess the paradigmatic congruence of included papers with their methods, methodologies and conceptual framework. This is in addition to the broader overall appropriateness of the qualitative methodology, credibility, transferability, dependability and confirmability, including detail of the reporting. No studies were excluded on assessment of quality grounds.

### Patient and public involvement:

Lack of resources prohibited the use of a designated patient and public group for this study. However, the research question was informed by engagement with members of the public and professionals in on going emergency care research.

### RESULTS:

A total of 936 articles were identified in the initial searching process. After duplicates were removed, the total number of records screened was 836. After screening titles and abstracts 769 articles were then excluded, which left 67 full-text articles to be assessed for eligibility by two members of the research team, independently. Of these, 39 articles were excluded for reasons including: no mention of the pre-hospital setting, included confirmed emergency patients only, no full article available, did not include children or was not relevant. Therefore, 28 articles were used in the systematic mapping review (Phase A) (n=21 quantitative, n=2 mixed methods, n=2 qualitative and n=2 literature reviews).

The Phase A papers were then read in detail to assess for any information regarding how the authors deemed calls to be 'appropriate' or 'inappropriate'. Eleven articles were excluded, due to no reference to the concept of 'appropriateness', leaving 17 articles for the qualitative synthesis stage of the review (Phase B) (n=13 quantitative, n=1 mixed methods, n=2 qualitative and n=1 literature review) [See Figure 1, PRISMA Flow chart] [19].

### **Phase A: Systematic Map: What factors are associated with ambulance use for non-emergency problems in children?**

A summary literature map including key themes was produced (table 1), followed by the development of categories (table 2).

| <i>Table 1 to show key themes for reasons associated with non-urgent calls to the ambulance service for children</i> |
|----------------------------------------------------------------------------------------------------------------------|
| 1. Geographical area (urban areas associated with more calls for non-urgent presentations)                           |
| 2. Lack of availability to be seen in primary care (both actual and perceived)                                       |
| 3. Uninsured patients (USA)                                                                                          |
| 4. Infants (under 1s)                                                                                                |
| 5. Level of parental education (including status and medical knowledge)                                              |

|                                                                                                                                   |
|-----------------------------------------------------------------------------------------------------------------------------------|
| 6. Lower socioeconomic area                                                                                                       |
| 7. Lack of understanding of the pre-hospital care system (unsure what qualifies for 'appropriate' ambulance call for their child) |
| 8. Parent perceived emergency- fever                                                                                              |
| 9. No other means of transportation                                                                                               |
| 10. First time parents                                                                                                            |
| 11. Parental unemployment                                                                                                         |
| 12. Schools                                                                                                                       |
| 13. Parental anxiety (particularly in higher socioeconomic areas)                                                                 |
| 14. Feeling of helplessness (particularly bystanders)                                                                             |

*Table 2 to Show Categories of Key Themes*

| <b>Socioeconomic status/Geographical</b> | <b>Practical reasons</b>                        | <b>Fear of consequences</b>                  | <b>Level of parental education</b>                    |
|------------------------------------------|-------------------------------------------------|----------------------------------------------|-------------------------------------------------------|
| Geographical area-urban                  | Lack of availability to be seen in primary care | Infants under 1 year                         | Status e.g. no degree                                 |
| Uninsured (USA)                          | No other means of transport                     | Schools                                      | Lack of understanding of the pre-hospital care system |
| Lower socioeconomic area                 |                                                 | Parental anxiety (higher socioeconomic area) |                                                       |
| Parental unemployment                    |                                                 | Feeling of helplessness                      | Perceived emergency                                   |
|                                          |                                                 |                                              | First time parents                                    |

*Socioeconomic status and geographical location:*

Several studies have found a significant link between location and non-emergency calls to the ambulance for children; in particular, urban areas were associated with more ambulance use [3, 20]. One study assessing the 'appropriateness' of ambulance use in paediatrics presenting to the Emergency Department (ED) identified a higher rate of what the authors termed as 'misuse' of ambulances for children in urban populations, and suggested that suburban parents would be less likely to call the ambulance 'inappropriately'. The authors wrote that suburban locations have lower rates of 'misuse', since they are accustomed to coming to the hospital via private vehicle [21].

One North American retrospective study found that parents with children in areas with lower income used EMS more frequently, and repetitively (11% called the ambulance more than once in the three years). The authors reported a significant linear relationship between transport rate and family income by postcode [22]. In a German study, medium socioeconomic status was associated with the lowest percentage of non-emergency calls to the ambulance service for children. There were several 'inappropriate' calls due to what the authors described as 'over anxiety' of parents in high socioeconomic areas, however this was still not as many as in the lower socioeconomic areas [23]. Salmi *et al.* [24] aimed to explore whether the socioeconomic status of a neighbourhood could predict the incidence of paediatric out of hospital emergencies in Finland, and concluded that poorer neighbourhoods significantly increased ambulance use for children.

1  
2  
3 Several studies reported that Medicaid patients account for the majority of non-emergency calls to  
4 the ambulance for children; 43% of patients were insured by Medicaid, (the United States federal  
5 and state program that helps with medical costs for people with limited income) and 60% of what  
6 the authors termed as 'unnecessary' calls were to those without commercial insurance [21]. Further  
7 studies also concluded that non-insured paediatric patients had significantly higher rates of  
8 ambulance use compared to those who were privately insured [20, 23, 25].  
9

#### 10 11 *Level of parental education:*

12  
13 The most common presenting complaint for 'inappropriate' ambulance use in children was fever;  
14 nearly half of the calls for fever in children were deemed non- emergency and an unnecessary use of  
15 the ambulance [21]. Ninety-two percent of children who were conveyed via ambulance to the ED  
16 with these symptoms were discharged home with no intervention [26]. The authors concluded that  
17 parents overestimate the seriousness of fever, and that parents are often unsure as to what qualifies  
18 as an emergency requiring an ambulance for their children [27].  
19

20  
21 A prospective single centre cohort study conducted in Germany aimed to provide current data on  
22 the 'inappropriate' use of ambulances for children and explore the reasons why. The main factor  
23 was parental perceived emergency, particularly with first time parents [23], which was a common  
24 finding in other studies [28]. A lower paternal and maternal educational status resulted in  
25 significantly more EMS use. Speculatively, the authors suggest that parents with low income have  
26 poorer medical knowledge and this is associated with 'inappropriate' use of ambulances- 'A lack of  
27 basic medical knowledge and experience in the proper assessment of children appears to be a  
28 contributing factor to inappropriate ambulance use for non-urgent problems'. Lower parental  
29 education or 'inadequate parental health literacy' as the authors write, seems to be associated with  
30 more calls internationally, and of these calls, more are low acuity [24].  
31  
32

#### 33 34 *Practical reasons:*

35  
36 Shah *et al.* [3] identified a link between increased EMS use for non-emergency problems in children  
37 if there was limited availability in Primary Care health services. Similarly Sinclair [29] found there  
38 was an increase in ambulance use due to lack of access to primary care physicians in the community,  
39 and lack of community support for children.  
40

41  
42 A common reason identified in the studies for parents calling an ambulance for non-emergency  
43 problems is lack of transport to take their child to the ED [30, 31]. This was particularly the case for  
44 single parents [2]. Kost and Arruda [21] report that parents admitted that they called the ambulance  
45 if there was no other means of transportation or if they had other childcare considerations; 'they  
46 would have used a taxi or shuttle if they could'. Similarly, one study found that often parents knew  
47 that an ambulance was not required, however 40% of parents stated they had no other means of  
48 transportation [32]. A descriptive survey study found that parents will call the ambulance for  
49 convenience as well as perceived need [33]. Additionally, one study found that parents believe that  
50 they will be seen faster in ED if they arrive there via ambulance [2].  
51

#### 52 53 *Fear of consequences:*

54  
55 Parents' and care givers' fear of doing the wrong thing ethically and morally, being advised by other  
56 healthcare professionals to follow a certain course of action (e.g. ambulance) even if they felt it  
57 clinically unnecessary, reduced confidence in their own judgement, and not wanting to take any risks  
58 were all common reasons for calling the ambulance for non-urgent problems in children [2]. One  
59 study found that parents of infants (under one) are more likely to utilise the ambulance service [22]  
60

and that parents often overestimate their child's illness [32]. Eastwood *et al.* [34] completed a descriptive epidemiological review in Australia, which showed that often parents call the ambulance for reassurance. As far as schools are concerned, the majority of ambulance transport is unjustified; however, schools call for emergency services due to fear of consequences, which poses an area of potential relief for the ambulance service which is already stretched to its limits [28]. Heightened anxiety due to previous experiences of traumatic events also resulted in 'inappropriate' calls to the ambulance [2].

**Phase B: Qualitative Synthesis: How are calls to the ambulance service for children deemed 'inappropriate'?**

A total of 15 descriptive themes were developed iteratively by repeated rounds of inductive grouping of codes, until no additional discrete codes were needed to fully describe the dataset (table 3). Through a process informed by the principles of charting, these descriptive themes were then organised and condensed into seven related (i.e. not mutually exclusive) descriptive thematic groups, by considering the axis of the descriptive themes (table 4). By analysing patterns in the free codes and descriptive themes within and across the seven thematic groups, a number of cross relationships between groups were identified. Through a process of comparing the theme groups and their constituent descriptive themes, three overarching analytical themes were identified and discussed below (table 5).

*Table 3 to show descriptive themes related to how calls to the ambulance for non-urgent problems in children have been deemed inappropriate*

|                                                                                                                                                                                                                                                                                  |
|----------------------------------------------------------------------------------------------------------------------------------------------------------------------------------------------------------------------------------------------------------------------------------|
| 1. Calls are deemed 'appropriate' by ED doctors using predetermined criteria from a Delphi study, such as: requiring CPR, respiratory distress, seizure, altered mental status, unable to walk, admitted to ICU, ambulance called by GP, RTA, parents not available to transport |
| 2. 'Inappropriate' if the main reason for the call was due to lack of transport                                                                                                                                                                                                  |
| 3. 'Inappropriate' if there has been no intervention/investigation/treatment in ED or by paramedics                                                                                                                                                                              |
| 4. Appropriateness determined using the Emergency Severity Index                                                                                                                                                                                                                 |
| 5. Classed as 'Inappropriate' if not an acute onset of symptoms                                                                                                                                                                                                                  |
| 6. Determined by ED doctors with varying levels of qualification – the more experience the clinician, the more they thought calls were 'Inappropriate'                                                                                                                           |
| 7. Parental perception of 'non-life threatening' associated with 'Inappropriate' calls                                                                                                                                                                                           |
| 8. 'Inappropriate' calls associated with not calling the GP first (if patients have tried this and exhausted alternative options than can be deemed as more appropriate)                                                                                                         |
| 9. Appropriateness was often based on vital signs                                                                                                                                                                                                                                |
| 10. Deemed 'Inappropriate' if assigned 'non-urgent' at triage in ED                                                                                                                                                                                                              |
| 11. Deemed 'Inappropriate' if could be managed more suitably in primary care                                                                                                                                                                                                     |
| 12. Australian Triage Score (if scores 4 or 5 then deemed non-urgent and inappropriate use)                                                                                                                                                                                      |
| 13. Deemed as non-urgent if it was safe to use alternative transport                                                                                                                                                                                                             |
| 14. Deemed non-urgent if the condition is unlikely to deteriorate or require admission/surgery                                                                                                                                                                                   |
| 15. 'Appropriate' if 'lights and sirens' are used                                                                                                                                                                                                                                |

*Table 4 to show thematic groups of how calls were determined to be 'inappropriate':*

|                                   |
|-----------------------------------|
| Determined by clinicians          |
| Determined retrospectively        |
| Determined on the level of acuity |
| Determined using a scoring system |

|                                                                                         |
|-----------------------------------------------------------------------------------------|
| Determined because of practical reasons, such as no transport and not contacting the GP |
| Determined because the problem would be more suitably managed in primary care           |
| Determined because of speaking to a GP first                                            |

*Table 5 to show analytical themes*

|                                                |
|------------------------------------------------|
| Practicalities and logistics of obtaining care |
| Arbitrary scoring system                       |
| Retrospection                                  |

The practicalities and logistics of obtaining care domain, contains descriptive themes relating to the practical reasons for determining ‘inappropriate’ use of an ambulance, including themes associated with convenience, access issues and transport. The arbitrary scoring system domain brings together descriptive themes concerning the use of scoring tools to determine whether a call to the ambulance is ‘inappropriate’ or not. The retrospection domain refers to the descriptive themes relating to calls being deemed as ‘inappropriate’ retrospectively by clinicians, for example after vital signs have been taken.

*Practicalities and logistics of obtaining care:*

Many of the themes identified that calls were considered to be ‘inappropriate’ because of practical aspects, logistical difficulties and convenience. In one study parents and care givers had called an ambulance solely due to having no other means of transportation, this was deemed as an ‘inappropriate’ use of the ambulance service [32]. The authors identified that 40% of parents admitted to calling the ambulance due to having no transport, and of those 80% were considered ‘inappropriate’. Other studies determined ‘inappropriate’ ambulance use if it was safe to use alternative transport [35, 30, 31].

Several studies suggested that parents and caregivers use ambulances for convenience and this is ‘inappropriate’ [32], particularly if the complaint could be suitably managed in primary care [36]. Parental perception of the situation as non-life threatening was associated with ‘inappropriate’ use of the ambulance service, where parents and caregivers actually expressed that ambulance transportation is more convenient, if not strictly a necessity at times [23]. ‘Inappropriate’ use of ambulances was associated with parents and care givers not calling a GP first when indicated (non-life-threatening medical need) [23], and when they sought advice from a GP first, the use of emergency services was considered more ‘appropriate’ [27]. Equally, calls to the ambulance for children were deemed ‘appropriate’ if patients had tried to access their GP, but that system has failed them [31].

*Arbitrary scoring system:*

Several studies sought to determine ‘inappropriateness’ using semi-objective arbitrary scoring or coding systems. Kost and Arruda[21] analysed records retrospectively and deemed ambulance transport unnecessary unless the medical record included any of the following criteria: Cardiopulmonary Resuscitation, respiratory distress, immobilisation, inability to walk, admission to Intensive care Unit, ambulance recommended by medical personnel, Road Traffic Collision, or parents not on scene. The authors considered these criteria to be more liberal than others. In Bober *et al.* [20] study, Accident and Emergency doctors considered 61% of paediatric arrivals by ambulance as ‘unnecessary’. The doctors determined ‘appropriateness’ using the emergency severity index levels (a validated triage tool used in the ED), which has been used in other studies



1  
2  
3 [37]. Similarly calls to the ambulance have been thought of as 'inappropriate' if they were deemed  
4 as non-emergency at triage in the ED [32]. Other tools used to determine 'appropriateness' is the  
5 Australian triage score[33]; if children scored 4 or 5 (non-urgent) then the call was thought to be'  
6 'inappropriate'.  
7

#### 8 *Retrospection:*

9  
10 The majority of studies sought to determine 'inappropriateness' retrospectively, normally by a  
11 variety of different clinicians. This is an important consideration, as this suggests that the call can  
12 only be deemed 'inappropriate' after the consultation process and diagnosis. In a German study,  
13 calls were determined to be an 'inadequate' or 'adequate' use of the ambulance service by three  
14 doctors of different seniority [23]. Interestingly, there were significant differences in what the three  
15 doctors considered to be 'inappropriate' calls to the ambulance service and this was dependent on  
16 experience; the more experienced doctor reported more calls to be 'inappropriate'. Similarly,  
17 'appropriate' use of the ambulance service in one study was determined by a doctor, based primarily  
18 on chief complaint, general appearance, vital signs, and ambulance patient report forms, which  
19 concluded that 61% of ambulance calls to children were 'inappropriate' [32]. A US study involving  
20 children utilised medical necessity criteria agreed at a consensus conference, to make an assessment  
21 on 'appropriateness', and concluded that 16.4% of all transports were an unnecessary use of the  
22 ambulance [25].  
23

24  
25  
26  
27 A qualitative study interviewing paramedics on what they considered to be the 'appropriate' use of  
28 the ambulance service concluded that a call is 'appropriate' if it needed 'lights and sirens' to hospital  
29 and was of a 'life threatening' nature [31]. Calls were considered 'inappropriate' if there had been no  
30 ambulance intervention [21], unless the child was under two years old [38], or if there was not an  
31 acute onset of symptoms [23]. It is clear that 'fever' as a presenting complaint is considered the  
32 most 'appropriate' use of ambulances for children by clinicians according to the literature [35].  
33  
34  
35

#### 36 **DISCUSSION:**

37  
38 This systematic review involved a two-stage process exploring which factors are associated with  
39 ambulance use for non-emergency problems in children, and how 'inappropriateness' in non-urgent  
40 ambulance use in children has been determined. The reasons for parents and care givers calling 999  
41 for their children with non-emergency conditions are complex and multifaceted. This review reveals  
42 an intricate relationship between the urgency of the clinical problem and the 'appropriateness' of  
43 ambulance service use. To our knowledge, there is no review exploring the factors associated with  
44 non-emergency ambulance use in children. An important consideration across the identified factors,  
45 which was illustrated by the systematic map (Phase A) was how to determine 'appropriateness' or  
46 not. Undertaking a thematic synthesis enabled the research team to go beyond the individual  
47 frameworks that each paper had used to determine this, and combined to the knowledge to identify  
48 gain understanding on the 'concept' of 'inappropriateness' in non-emergency ambulance use in  
49 children.  
50  
51  
52

#### 53 *Systematic Map:*

54  
55 Previous work examines how help-seeking may apply to some urgent care settings, such as EDs [39,  
56 40]. It is apparent that some parents will bring their child to the ED for non-urgent care, due to  
57 perceived difficulties with contacting their GP, and the presumed advantages of ED care. Findings  
58 from this review also suggest that parents call the ambulance for non-emergency problems due to  
59  
60



1  
2  
3 perceived barriers for accessing their GP, and speed of access. The studies in the review suggested  
4 that perceived problems with primary healthcare services were affecting parents' and caregivers'  
5 use of the ED and ambulance services for minor illness. Convenience was also a reason highlighted in  
6 the studies for parents attending the ED [41]. Perceived urgency was a main theme identified in this  
7 study and is also the most frequently cited reason for visiting the ED by parents of children  
8 presenting with non-urgent issues [41]. Often, parents felt that their child's condition constituted a  
9 genuine emergency, but did not necessarily require an ambulance, which was called due to lack of  
10 transportation. First-time parents, and children under one year were common reasons for non-  
11 emergency calls to the ambulance service, which aligns with other studies on presentation at EDs,  
12 which was increased among parents of newborns and first-time parents [42].

13  
14  
15  
16 Aligning with previous studies focused on adults, our findings show that increased ambulance use  
17 for non-urgent problems in children is conceptually associated with lower socio-economical urban  
18 locations [43]. In addition, this review identified that uninsured children (US studies) was an  
19 associating factor for non-emergency ambulance use, which has also been reported in previous  
20 studies of adults [25]. Another common motivator is lack of transport, which is a factor also  
21 identified in the non-emergency use of ambulance services with adults [44]. The socio-demographic  
22 factors of rurality, deprivation and education may warrant further investigation to understand the  
23 underlying factors behind this increased use.

24  
25  
26 The most common presenting complaint associated with non-emergency calls to the ambulance  
27 service for children was fever [26]. This suggests an area of parental education that could be  
28 improved in order to reduce non-emergency calls to the ambulance service, and may have  
29 implications to how calls are triaged. This is reported in other studies suggesting that focusing  
30 educational efforts in regards to 'appropriate' ambulance use on the adolescent population will  
31 likely reduce 'inappropriate' ambulance use in the paediatric population [20]. Additionally, further  
32 exploration at the ambulance triage and dispatch stage for children may be beneficial [20]. Fear of  
33 the consequences among parents and care-givers where children are concerned is a clear factor in  
34 increased ambulance use, however, parental concern could be a legitimate triage discriminator.  
35 Recurring messages in other literature also portrays patient and carer uncertainty around urgency,  
36 the fear of harm if treatment is delayed and the value placed on clinical assessment for reassurance  
37 [45]. The findings of this review indicate that parents and carers often do not know exactly what  
38 type of help they need when they contact urgent care services, or what constitutes a need for an  
39 emergency ambulance for their child [23]. Providing parents with the knowledge about what  
40 constitutes emergency and non-emergency care for typical infantile diseases could help with  
41 parents' decision making.

#### 42 43 44 45 46 *Qualitative synthesis:*

47  
48 The assessment of 'inappropriateness' of an ambulance contact is multifaceted and diverse in the  
49 evidence, which is a result of methodological limitations and conceptual variation. According to the  
50 evidence 'Inappropriate' use of the ambulance service for children is at a similarly high level to that  
51 of the adult population [21]. The majority of studies sought to determine 'inappropriateness'  
52 retrospectively, using semi-objective (yet arbitrary) scoring systems, and almost universally  
53 determined by clinicians following an assessment that included recording of vital signs [46].  
54 However, the assessment of 'appropriateness' based on information obtainable after clinical  
55 assessment will likely overestimate 'inappropriate' use, and disregards the multifaceted psychosocial  
56 context of the demand for help, which is even greater when concerning children. Authors have  
57 suggested that there is not enough information in the 'diagnostic label' alone to judge whether a call  
58 is 'appropriate' or not [5].  
59  
60

1  
2  
3 Clearly, one of the issues with deeming a call to be 'inappropriate' is how this is classified differently  
4 by professionals, compared to the lay public [4]. The higher the acuity, the greater it seems to be  
5 considered as 'appropriate' by clinicians. However, there are no hard and fast criteria; for example,  
6 'those needing lights and sirens' is still a personal judgement. It seems that if a *clinician* thinks it is an  
7 urgent call, then it is 'appropriate' but what is urgent to a clinician can be different to the general  
8 public. Indeed, as reflected in the findings from the current study, previous literature suggests  
9 differences between clinician classifications of emergency (based on physiological measures) are in  
10 contrast with patient-based determinations of emergency, (often defined by practical factors or fear  
11 of consequences).

12  
13  
14 There is suggestion that calls are 'inappropriate' if there is no ambulance intervention, however this  
15 is arguable because patients often benefit from rapid transportation, particularly children [21]. Calls  
16 were deemed as 'inappropriate' if other transport options or other services were available and more  
17 suitable [30]. In other work, studies have shown that patients and carers 'weigh up' how practical  
18 the use of the ambulance service (or alternatives) are for their perceived needs, and sometimes  
19 patients genuinely expect the ambulance service to treat minor ailments [7]. This shows a lack of  
20 public and caregiver understanding about the use of ambulances for paediatrics.

#### 21 22 23 24 25 26 *Limitations:*

27 The heterogeneity of study methodologies presents a challenge in drawing together associated and  
28 conflicting findings. There is little evidence available addressing the specific question, reflected in  
29 the small number of studies suitable to the review criteria. Because of the limited evidence, the  
30 analysis is limited in areas. Much of the data is retrospective and therefore often incomplete and not  
31 recorded accurately. All included studies in this review were carried out in wealthy countries. It is  
32 likely that many of the issues will remain the same for low-income countries, however some will be  
33 unique given the variability in cultural, economic and political contexts. By limiting our searches to  
34 the English language, we may have inadvertently excluded important sources.

#### 35 36 37 38 39 40 **CONCLUSION AND FUTURE RESEARCH:**

41 There is a lack of public and caregiver understanding about the use of ambulances for paediatrics.  
42 There are some factors that appear specific to choosing ambulance care for children that are not so  
43 prominent in adults (fever, reassurance, fear of consequences) and there are some ways in which  
44 'appropriateness' might be looked at differently for children and adults. Further primary, qualitative  
45 research is required to explore parents, care givers, teachers and young teenagers' reasons for  
46 calling the ambulance for non-emergency problems in children. Providing alternate means of  
47 transportation, strategies for helping care givers to mitigate perceived risk, increasing the perception  
48 and reality of access to urgent primary care or targeted education to certain residential areas and  
49 first time parents with infants (particularly regarding fever), may decrease unnecessary ambulance  
50 activation for paediatric low acuity complaints. Most studies included were conducted in high-  
51 income countries, subsequently there is a need for further investigation among low-income  
52 countries, which may provide important and unique insights. Future interventions could be designed  
53 to impact parents' decision making prior to calling an ambulance for their child. Both policy makers  
54 and academics need to work towards a contextually-nuanced and consistent definition of  
55 'appropriate' ambulance resource use.  
56  
57  
58  
59  
60

**Word Count (excluding tables, titles, references):**

5300

**Keywords:**

Systematic review; non-emergency; ambulance; children; qualitative synthesis; appropriateness

**Conflict of interest:**

NONE

No support from any organisation for the submitted work; no financial relationships with any organisations that might have an interest in the submitted work in the previous three years, no other relationships or activities that could appear to have influenced the submitted work.

**Copyright:**

The Corresponding Author has the right to grant on behalf of all authors and does grant on behalf of all authors, an exclusive licence (or non-exclusive for government employees) on a worldwide basis to the BMJ Publishing Group Ltd to permit this article (if accepted) to be published in BMJ editions and any other BMJ PGL products and sublicenses such use and exploit all subsidiary rights, as set out in our licence.

**Transparency statement:**

This manuscript is an honest, accurate and transparent account of the study being reported. No important aspects of the study have been omitted and any discrepancies from the study as originally planned have been explained.

**Funding source:**

MB is funded by an NIHR Clinical Lecturer Post

**Data sharing:**

No additional data available

**Contributor statement:**

MB developed the original idea and supervised the work. AP conducted the review and took a lead on writing the manuscript. All authors interpreted and analysed the results. All authors discussed the results and contributed to the final manuscript. HB finalised approval of the version to be published.

**Ethical Statement:**

Not required

**REFERENCES:**

- [1] NHS England (2013) High quality care for all, now and for future generations: Transforming urgent and emergency care services in England. Available at: <https://www.england.nhs.uk/wp-content/uploads/2013/06/urg-emerg-care-ev-bse.pdf> [Accessed 30 July 2020].
- [2] O’Cathain, A., Connel, J., Long, J. and Coster, J. (2019) ‘Clinically unnecessary’ use of emergency and urgent care: A realist review of patients' decision making. *Health Expectations*, 23(1).
- [3] Shah, M.N., Cushman, J.T., Davis, J. Bazarian, J., Auinger, P, and Friedman, B. (2008) The epidemiology of emergency medical services use by children: an analysis of the national hospital ambulatory medical care survey, *Prehospital Emergency Care*, 12(3), pp. 269-76.
- [4] Morgans, A. and Burgess, S.J. (2011) What is a health emergency? The difference in definition and understanding between patients and health professionals. *Australian Health Review*, 35(3), pp. 284-289.
- [5] Snooks, H., Wrigley, H. and George, S. (1998) Appropriateness of use of emergency ambulances. *Journal of Accident Emergency Medicine*, 15, pp. 212–18.
- [6] Durand, A.C., Palazzolo, S., Hardouin, N.T., Gerbeaux, P., Sambuz, R., and Gentile, S. (2012) Nonurgent patients in emergency departments: rational or irresponsible consumers? Perceptions of professionals and patients. *BMC Research Notes*, 5(525).
- [7] Booker, M.J., Purdy, S. and Shaw, A.R.G. (2017) Seeking ambulance treatment for ‘primary care’ problems: a qualitative systematic review of patient, carer and professional perspectives. *BMJ Open*.
- [8] Grant, M.J. and Booth, A. A. (2009) Typology of reviews: an analysis of 14 review types and associated methodologies. *Health Info Library*, 26(91).
- [9] Oakley, A., Gough, D. and Oliver, S. (2005) The politics and evidence of methodology: lessons from the EPPI-Centre. *Evid Policy*, 1(5).
- [10] Pope, C., Mays, N. and Popay, J. (2007) *Synthesizing qualitative and quantitative health evidence: a guide to methods*. Berkshire, England: Open University Press.
- [11] World Health Organisation (2020) *Definition of Key Terms*. Available at <https://www.who.int/hiv/pub/guidelines/arv2013/intro/keyterms/en/> [Accessed 02/08/20].
- [12] Thomas, J. and Harden, A. (2008) Methods for the thematic synthesis of qualitative research in systematic reviews. *BMC Med Res Methodology*, 8(45).
- [13] Campbell, R., Pound, P., Pope, C., Britten, N., Pill, R., Morgan, M., et al. (2003). Evaluating meta-ethnography: a synthesis of qualitative research on lay experiences of diabetes and diabetes care. *Social Science & Medicine*, 56, pp. 671-684.
- [14] Dixon-Woods, M., Cavers, D. and Agarwal, S. (2006) Conducting a critical interpretive synthesis of the literature on access to healthcare by vulnerable groups. *BMC Med Res Methodol*, pp. 35–47.
- [15] Sandelowski, M., Voils, C.I. and Barroso, J. (2006) Defining and designing mixed research synthesis studies. *Res Sch*, pp. 13:29.
- [16] Heyvaert, M., Hannes, K. and Onghena, P. (2016) *Using mixed-methods research synthesis for literature reviews*. New York: Sage Publications.

- 1  
2  
3 [17] Hong, Q.N., Pluye, P. and Bujold, M. (2017) Convergent and sequential synthesis designs:  
4 implications for conducting and reporting systematic reviews of qualitative and quantitative  
5 evidence. *Syst Rev*, pp. 6:61.  
6  
7 [18] Long, H.A., French, D.P. and Brooks, J.M. (2020) Optimising the value of the critical appraisal  
8 skills programme (CASP) tool for quality appraisal in qualitative evidence synthesis. *Research*  
9 *Methods in Medicine and Health Sciences*, 1(1).  
10  
11 [19] Moher, D., Liberati, A., Tetzlaff, J. and Altman, D.G. (2009). Preferred reporting items for  
12 systematic reviews and meta-analyses: The PRISMA statement. *PLOS Med*, 6(7).  
13  
14 [20] Bober, J., Stefanov, D., Paladino, L., Sinert, R and Jennifer, C. (2017) The role of health insurance  
15 in paediatric ambulance use: are children just small adults?, *Open Access Text*.  
16  
17 [21] Kost, S. and Arruda, J. (2009) Appropriateness of ambulance transportation to a suburban  
18 paediatric emergency department, *Pre-hospital Emergency Care*, 3(3), pp. 187-90.  
19  
20 [22] Miller, M.K., Dowd, D., Gratton, M.C., Cai, J, and Simon, S.D. (2009) Paediatric out of hospital  
21 emergency medical services utilization in Kansas city, Missouri, *Journal of the Society for Academic*  
22 *Emergency Medicine*, 16(6), pp. 526-531  
23  
24 [23] Poryo, M., Burger, M., Wagenpfeil, S., Ziegler, B., Sauer, H., Flotats-Bastardas, M., Grundmann,  
25 U., Zemlin, M. and Meeyer, S. (2019) Assessment of Inadequate use of paediatric emergency medical  
26 transport services: the paediatric emergency and ambulance critical evaluation study, *Frontiers in*  
27 *Paediatrics*.  
28  
29 [24] Salmi, H., Kuisma, M., Rahiala, E., Laaperi, M. and Harve- Rytsala. (2018) Children in  
30 disadvantaged neighbourhoods have more out of hospital emergencies: a population based study,  
31 *British Medical Journal*, 103(11).  
32  
33 [25] Patterson, D., Baxley, E., Probst, J., Hussey, J. and Moore, C. (2006) Medically Unnecessary  
34 Emergency Medical Services (EMS) Transports Among Children Ages 0 to 17 Years, *Maternal and*  
35 *Child Health Journal*, 10, pp. 527-536.  
36  
37 [26] Fessler, S.J., Simon, H., Yancey, A.H., Colman, M. and Hirsh, D. (2013) How well do general EMS  
38 911 dispatch protocols predict ED resource utilization for paediatric patients? *The American Journal*  
39 *of Emergency Medicine*, 32(3), pp. 199-202.  
40  
41 [27] Watts, J., Cowden, J.D., Cupertino, A.P., Dowd, M.D. and Kennedy, C. (2011) 911: Spanish  
42 speaking parents perspectives on prehospital emergency care for children, *Journal of Immigrant and*  
43 *Minority Health*, 13(3), pp. 526-32.  
44  
45 [28] Wilkinson, D. and Heinz, P. (2014) Paediatric emergency ambulance transport: who calls 999  
46 and why? *British Medical Journal*, (99)1.  
47  
48 [29] Sinclair, D. (2007) Emergency Department overcrowding- implications for paediatric emergency  
49 medicine, *Paediatric Child Health*, 12(6), pp. 491-494.  
50  
51 [30] Champagne, Langabeer, T., Langabeer, J.R., Roberts, K.E., Gross, J.S., Gleisberg, G.R., Gonzalez,  
52 M.G. and Persse, D. (2019) Telehealth impact on primary care related ambulance transports,  
53 *Prehospital Emergency Care*, 23(5), pp. 712-717.  
54  
55 [31] Dejean, D., Giacomini, M., Welsford, M., Schwartz, L. and Deciccs, P. (2016) Inappropriate  
56 ambulance use: a qualitative study of paramedics' views, *Healthcare Policy*, 11(30), pp. 67-79.  
57  
58  
59  
60

- 1  
2  
3 [32] Camasso- Richardson, K., Wilde, J.A. and Petrack, E.M (1991) Medically unnecessary paediatric  
4 ambulance transports: a medical taxi service? *Academic Emergency Medicine*, 4(12), pp. 1137-41.  
5  
6 [33] Unwin, M., Kinsman, L. and Rigby, S. (2016) Why are we waiting? Patients' perspectives for  
7 accessing emergency department services with non-urgent complaints, *International Emergency*  
8 *Nursing*, 29, pp. 3-8.  
9  
10 [34] Eastwood, K., Morgans, A., Smith, K., Hodgkinson, A., Becker, G. and Stoelwinder, J. (2016) A  
11 novel approach for managing the growing demand for the ambulance services by low acuity  
12 patients, *Australian Health Review*, 40(4), pp. 378-384.  
13  
14 [35] Richards, M.E., Hubble, M.W., Burke, S. (2011) Inappropriate paediatric emergency medical  
15 services utilisation redefined, *Paediatric Emergency Care*, 27(6), pp. 514-8.  
16  
17 [36] Sprivulis, P., Grainger, S., Nagree, Y. (2005) Ambulance diversion is not associated with low  
18 acuity patients attending Perth metropolitan emergency departments, *Emergency Medicine*  
19 *Australasia*, 17(1), pp. 11-5.  
20  
21 [37] Gregory, E.F., Chamberlain, J.M., Teach, S.J., Engstrom, R. and Mathison, D.J. (2017) Geographic  
22 variation in the use of low acuity paediatric emergency medical services, *Paediatric Emergency Care*,  
23 33(2), pp. 73-79.  
24  
25 [38] Blundell, K. and Abrahamson, E. (2015) Inappropriate ambulance use in paediatrics, *British*  
26 *Medical Journal*, 100(3).  
27  
28 [39] Langer, S., Chew-Graham, C. and Hunter, C. (2013) Why do patients with long-term conditions  
29 use unscheduled care? A qualitative literature review. *Health Social Care Community*, 21, pp. 339–  
30 51.  
31  
32 [40] Berry, A., Brousseau, D., Brotanek, J., Tomany-Korman, S. and Flores, G. (2008) Why do parents  
33 bring children to the emergency department for non-urgent conditions? A qualitative study.  
34 *Ambulatory Paediatric*, 8(6), pp. 360-7.  
35  
36 [41] Butun, A., Linden, M., Lynn, F. and McGaughey, J. (2018) Exploring parents' reasons for  
37 attending the emergency department for children with minor illnesses: a mixed methods systematic  
38 review, *Emergency Medical Journal*, pp. 1-8.  
39  
40 [42] Fieldston, E.S., Alpern, E.R., Nadel, F.M. (2012) A qualitative assessment of reasons for non-  
41 urgent visits to the emergency department: parent and health professional opinions. *Paediatric*  
42 *Emergency Care*, (28), pp. 220- 225.  
43  
44 [43] Rucker, D.W., Edwards, R.A. and Burstin, H.R (1997) Patient-specific predictors of ambulance  
45 use. *Annals of Emergency Medicine*, 28, pp. 484–91  
46  
47 [44] Kawakami, C., Ohshige, K. and Kubota, K. (2007) Influence of socioeconomic factors on  
48 medically unnecessary ambulance calls. *BMC Health Services Research*, 7(120).  
49  
50 [45] Ahl, C., Nyström, M. and Jansson L (2006) Making up one's mind: patients' experiences of calling  
51 an ambulance. *Accident Emergency Nursing*, 14, pp. 11–19.  
52  
53 [46] Durant, E. and Fahimi, J (2012) Factors associated with ambulance use among patient with low-  
54 acuity conditions. *Prehospital Emergency Care*, 16, pp. 329–37  
55  
56  
57  
58  
59  
60

- Figure 1 PRISMA flowchart to be inputted on page 7, reference [19].





PRISMA flow diagram

145x143mm (96 x 96 DPI)





# PRISMA 2009 Checklist

| Section/topic                      | #  | Checklist item                                                                                                                                                                                                                                                                                              | Reported on page # |
|------------------------------------|----|-------------------------------------------------------------------------------------------------------------------------------------------------------------------------------------------------------------------------------------------------------------------------------------------------------------|--------------------|
| <b>TITLE</b>                       |    |                                                                                                                                                                                                                                                                                                             |                    |
| Title                              | 1  | Identify the report as a systematic review, meta-analysis, or both.                                                                                                                                                                                                                                         | 1                  |
| <b>ABSTRACT</b>                    |    |                                                                                                                                                                                                                                                                                                             |                    |
| Structured summary                 | 2  | Provide a structured summary including, as applicable: background; objectives; data sources; study eligibility criteria, participants, and interventions; study appraisal and synthesis methods; results; limitations; conclusions and implications of key findings; systematic review registration number. | 2                  |
| <b>INTRODUCTION</b>                |    |                                                                                                                                                                                                                                                                                                             |                    |
| Rationale                          | 3  | Describe the rationale for the review in the context of what is already known.                                                                                                                                                                                                                              | 3                  |
| Objectives                         | 4  | Provide an explicit statement of questions being addressed with reference to participants, interventions, comparisons, outcomes, and study design (PICOS).                                                                                                                                                  | 1,3                |
| <b>METHODS</b>                     |    |                                                                                                                                                                                                                                                                                                             |                    |
| Protocol and registration          | 5  | Indicate if a review protocol exists, if and where it can be accessed (e.g., Web address), and, if available, provide registration information including registration number.                                                                                                                               | 2                  |
| Eligibility criteria               | 6  | Specify study characteristics (e.g., PICOS, length of follow-up) and report characteristics (e.g., years considered, language, publication status) used as criteria for eligibility, giving rationale.                                                                                                      | 4,5                |
| Information sources                | 7  | Describe all information sources (e.g., databases with dates of coverage, contact with study authors to identify additional studies) in the search and date last searched.                                                                                                                                  | 4,5                |
| Search                             | 8  | Present full electronic search strategy for at least one database, including any limits used, such that it could be repeated.                                                                                                                                                                               | Sup file           |
| Study selection                    | 9  | State the process for selecting studies (i.e., screening, eligibility, included in systematic review, and, if applicable, included in the meta-analysis).                                                                                                                                                   | 4,5                |
| Data collection process            | 10 | Describe method of data extraction from reports (e.g., piloted forms, independently, in duplicate) and any processes for obtaining and confirming data from investigators.                                                                                                                                  | 5,6                |
| Data items                         | 11 | List and define all variables for which data were sought (e.g., PICOS, funding sources) and any assumptions and simplifications made.                                                                                                                                                                       | 5                  |
| Risk of bias in individual studies | 12 | Describe methods used for assessing risk of bias of individual studies (including specification of whether this was done at the study or outcome level), and how this information is to be used in any data synthesis.                                                                                      | 5,6                |
| Summary measures                   | 13 | State the principal summary measures (e.g., risk ratio, difference in means).                                                                                                                                                                                                                               | 4,5,6              |
| Synthesis of results               | 14 | Describe the methods of handling data and combining results of studies, if done, including measures of consistency (e.g., $I^2$ ) for each meta-analysis.                                                                                                                                                   | 5,6                |



# PRISMA 2009 Checklist

| Section/topic                 | #  | Checklist item                                                                                                                                                                                           | Reported on page # |
|-------------------------------|----|----------------------------------------------------------------------------------------------------------------------------------------------------------------------------------------------------------|--------------------|
| Risk of bias across studies   | 15 | Specify any assessment of risk of bias that may affect the cumulative evidence (e.g., publication bias, selective reporting within studies).                                                             | 5,6                |
| Additional analyses           | 16 | Describe methods of additional analyses (e.g., sensitivity or subgroup analyses, meta-regression), if done, indicating which were pre-specified.                                                         | 5,6                |
| <b>RESULTS</b>                |    |                                                                                                                                                                                                          |                    |
| Study selection               | 17 | Give numbers of studies screened, assessed for eligibility, and included in the review, with reasons for exclusions at each stage, ideally with a flow diagram.                                          | 6,7                |
| Study characteristics         | 18 | For each study, present characteristics for which data were extracted (e.g., study size, PICOS, follow-up period) and provide the citations.                                                             | 6                  |
| Risk of bias within studies   | 19 | Present data on risk of bias of each study and, if available, any outcome level assessment (see item 12).                                                                                                | 6,7                |
| Results of individual studies | 20 | For all outcomes considered (benefits or harms), present, for each study: (a) simple summary data for each intervention group (b) effect estimates and confidence intervals, ideally with a forest plot. | 7,8,9,10,11        |
| Synthesis of results          | 21 | Present results of each meta-analysis done, including confidence intervals and measures of consistency.                                                                                                  | 9,10,11,12         |
| Risk of bias across studies   | 22 | Present results of any assessment of risk of bias across studies (see Item 15).                                                                                                                          | N/A                |
| Additional analysis           | 23 | Give results of additional analyses, if done (e.g., sensitivity or subgroup analyses, meta-regression [see Item 16]).                                                                                    | N/A                |
| <b>DISCUSSION</b>             |    |                                                                                                                                                                                                          |                    |
| Summary of evidence           | 24 | Summarize the main findings including the strength of evidence for each main outcome; consider their relevance to key groups (e.g., healthcare providers, users, and policy makers).                     | 13,14              |
| Limitations                   | 25 | Discuss limitations at study and outcome level (e.g., risk of bias), and at review-level (e.g., incomplete retrieval of identified research, reporting bias).                                            | 14                 |
| Conclusions                   | 26 | Provide a general interpretation of the results in the context of other evidence, and implications for future research.                                                                                  | 14                 |
| <b>FUNDING</b>                |    |                                                                                                                                                                                                          |                    |
| Funding                       | 27 | Describe sources of funding for the systematic review and other support (e.g., supply of data); role of funders for the systematic review.                                                               | 16                 |

From: Moher D, Liberati A, Tetzlaff J, Altman DG, The PRISMA Group (2009). Preferred Reporting Items for Systematic Reviews and Meta-Analyses: The PRISMA Statement. PLoS Med 6(7): e1000097. doi:10.1371/journal.pmed1000097

For more information, visit: [www.prisma-statement.org](http://www.prisma-statement.org).
